# Supplementary material for: CuCl-catalyzed aerobic oxidation of 2,3-allenols to 1,2-allenic ketones with 1:1 combination of phenanthroline and bipyridine as ligands
Source: publisher site journal article supplement (doi:10.3762/bjoc.7.51), 2011-04-07

**Supporting Information**  
**for**  
**CuCl-catalyzed aerobic oxidation of 2,3-allenols**  
**to 1,2-allenic ketones with 1:1 combination of**  
**phenanthroline and bipyridine as ligands**

Shuxu Gao<sup>1</sup>, Yu Liu<sup>1</sup>, and Shengming Ma<sup>\*1,2</sup>

Address: <sup>1</sup>Shanghai Key Laboratory of Green Chemistry and Chemical Processes, Department of Chemistry, East China Normal University, 3663 North Zhongshan Road, Shanghai 200062, P. R. China and <sup>2</sup>State Key Laboratory of Organometallic Chemistry, Shanghai Institute of Organic Chemistry, Chinese Academy of Sciences, 345 Lingling Lu, Shanghai 200032, P. R. China. Fax: (+86)-21-6260-9305

Email: Shengming Ma\* - masm@sioc.ac.cn

\* Corresponding author

**<sup>1</sup>H and <sup>13</sup>C NMR spectra of products prepared**

7.774  
7.750  
7.519  
7.494  
7.470  
7.412  
7.386  
7.362  
7.260

5.053  
5.044  
5.035

2.435  
2.426  
2.412  
2.403  
2.377  
2.367  
1.559  
1.538  
1.514  
1.488  
1.464  
1.430  
1.408  
1.389  
1.378  
1.358  
1.328  
1.318  
1.307  
1.260  
0.915  
0.893  
0.871

gsx-3-22

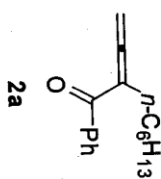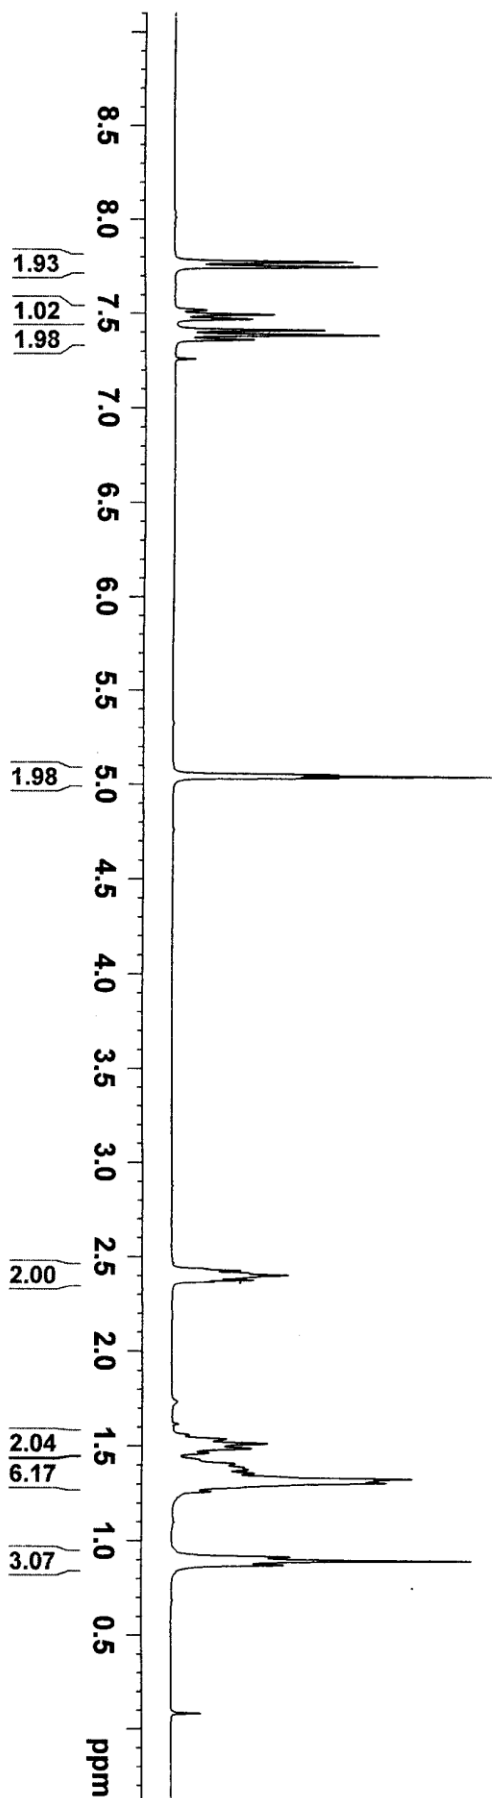

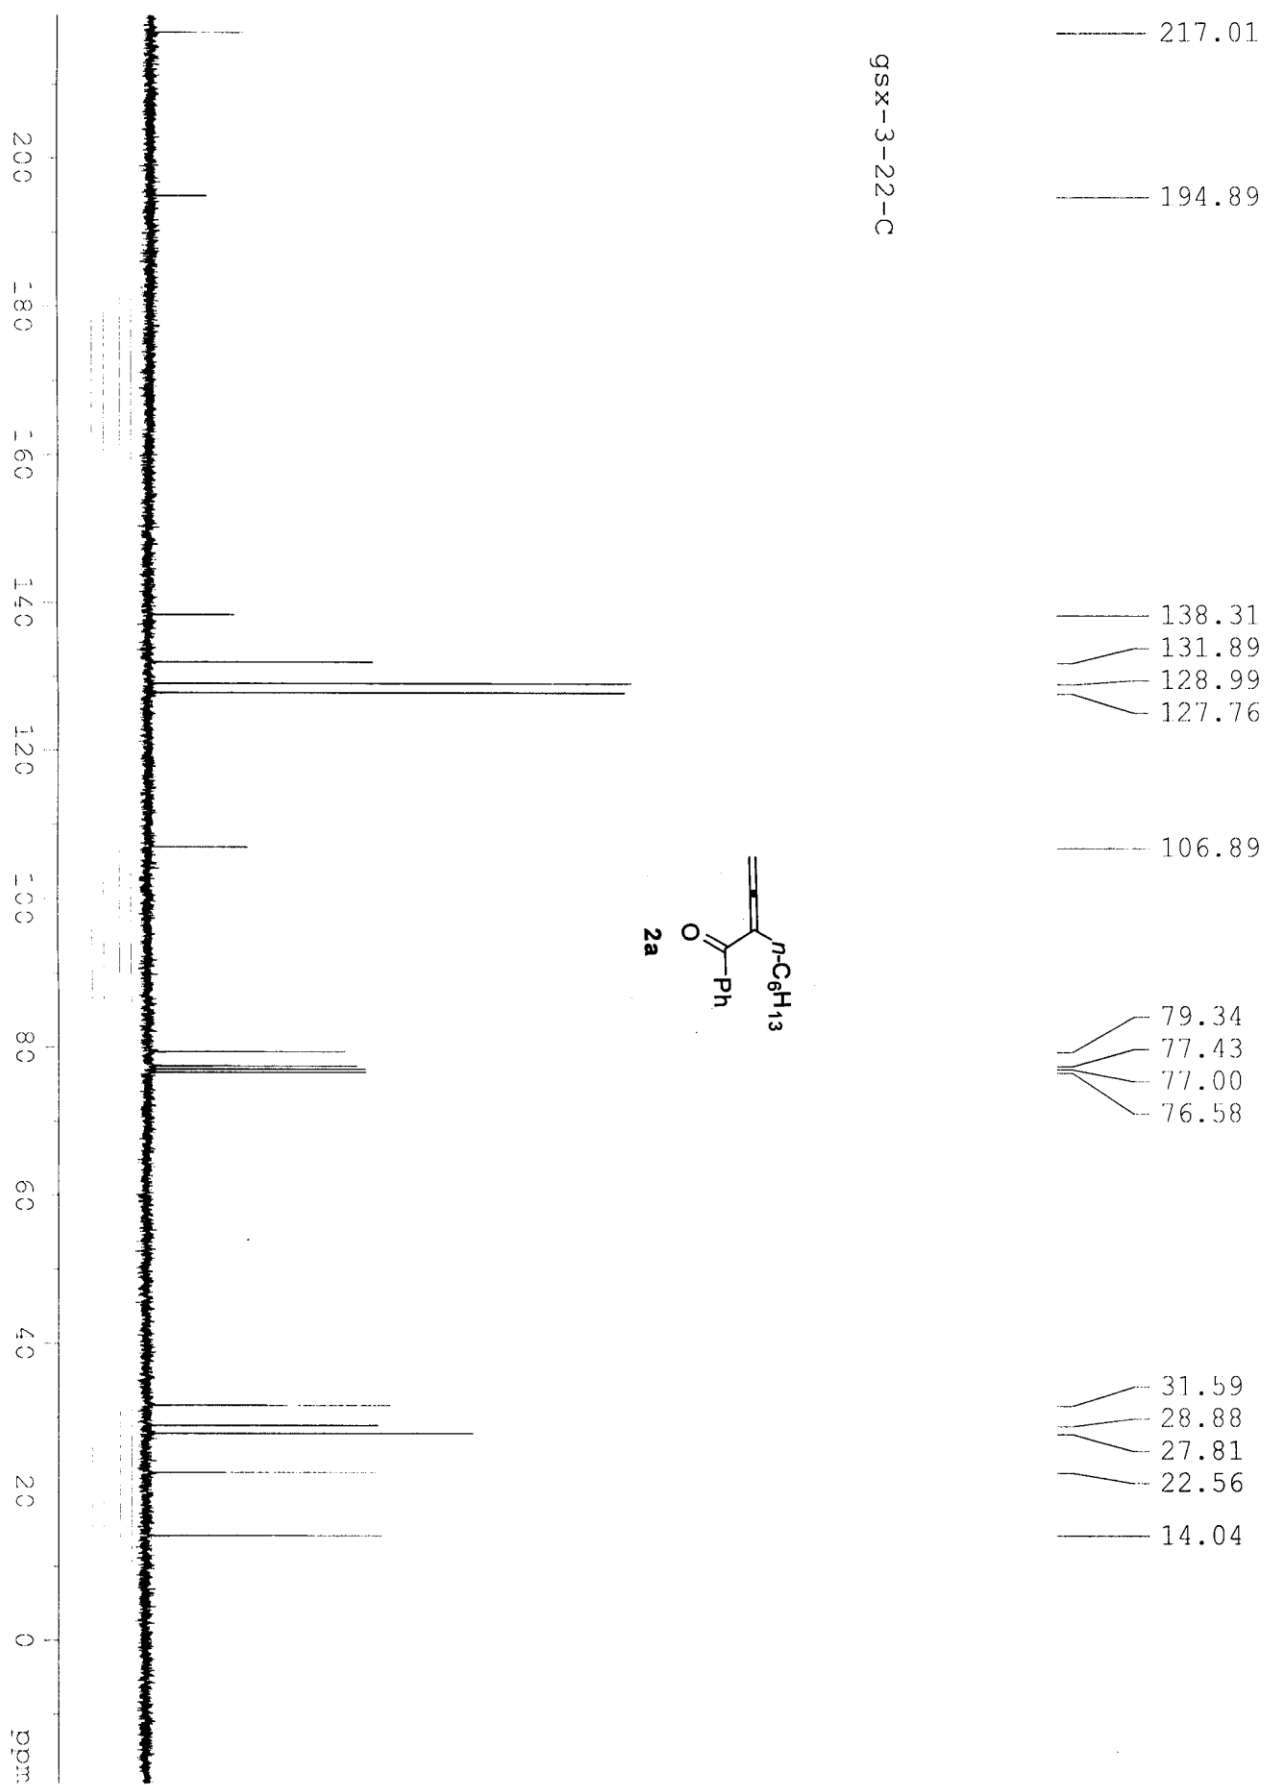

gsx-3-23

7.743  
7.716  
7.260  
7.234  
7.207

5.056  
5.047  
5.037

2.725  
2.700  
2.675  
2.649  
2.417  
2.408  
2.384  
2.358  
2.349  
1.603  
1.578  
1.553  
1.528  
1.503  
1.479  
1.274  
1.249  
1.224  
1.009  
0.985  
0.960

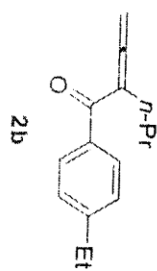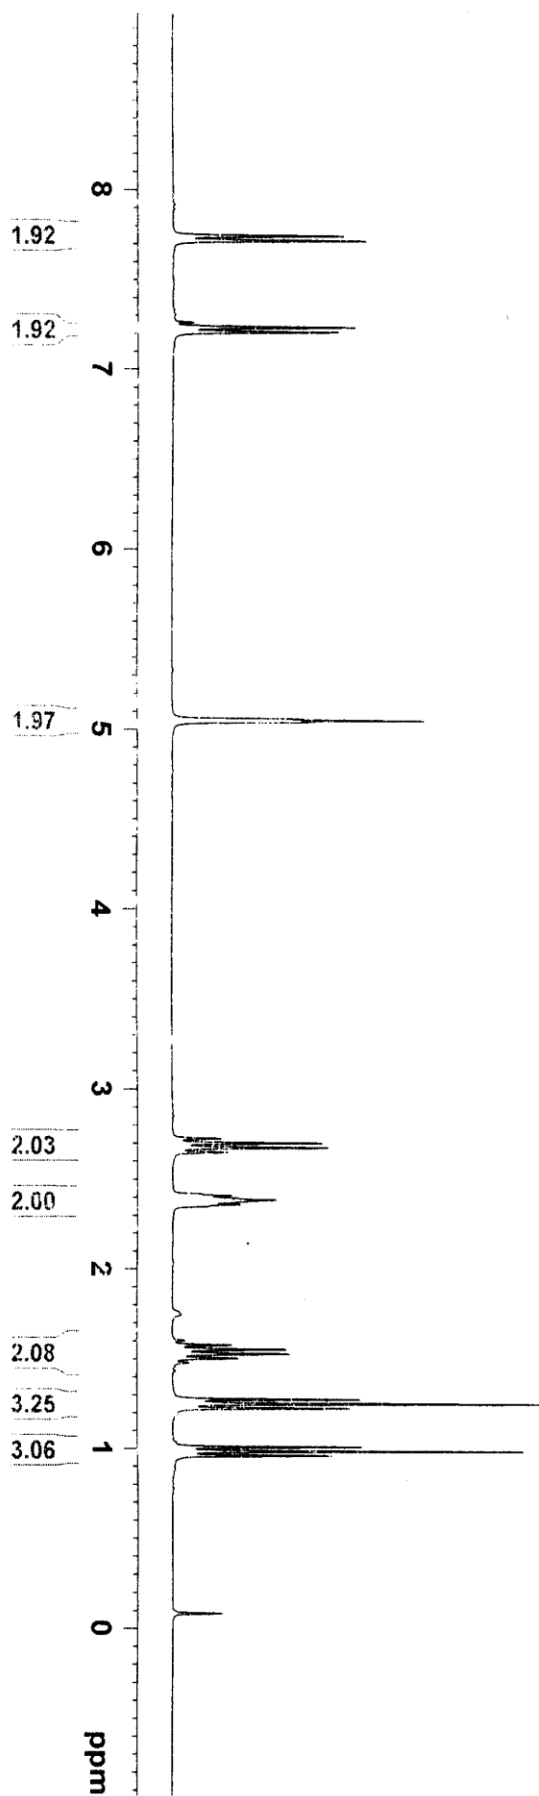

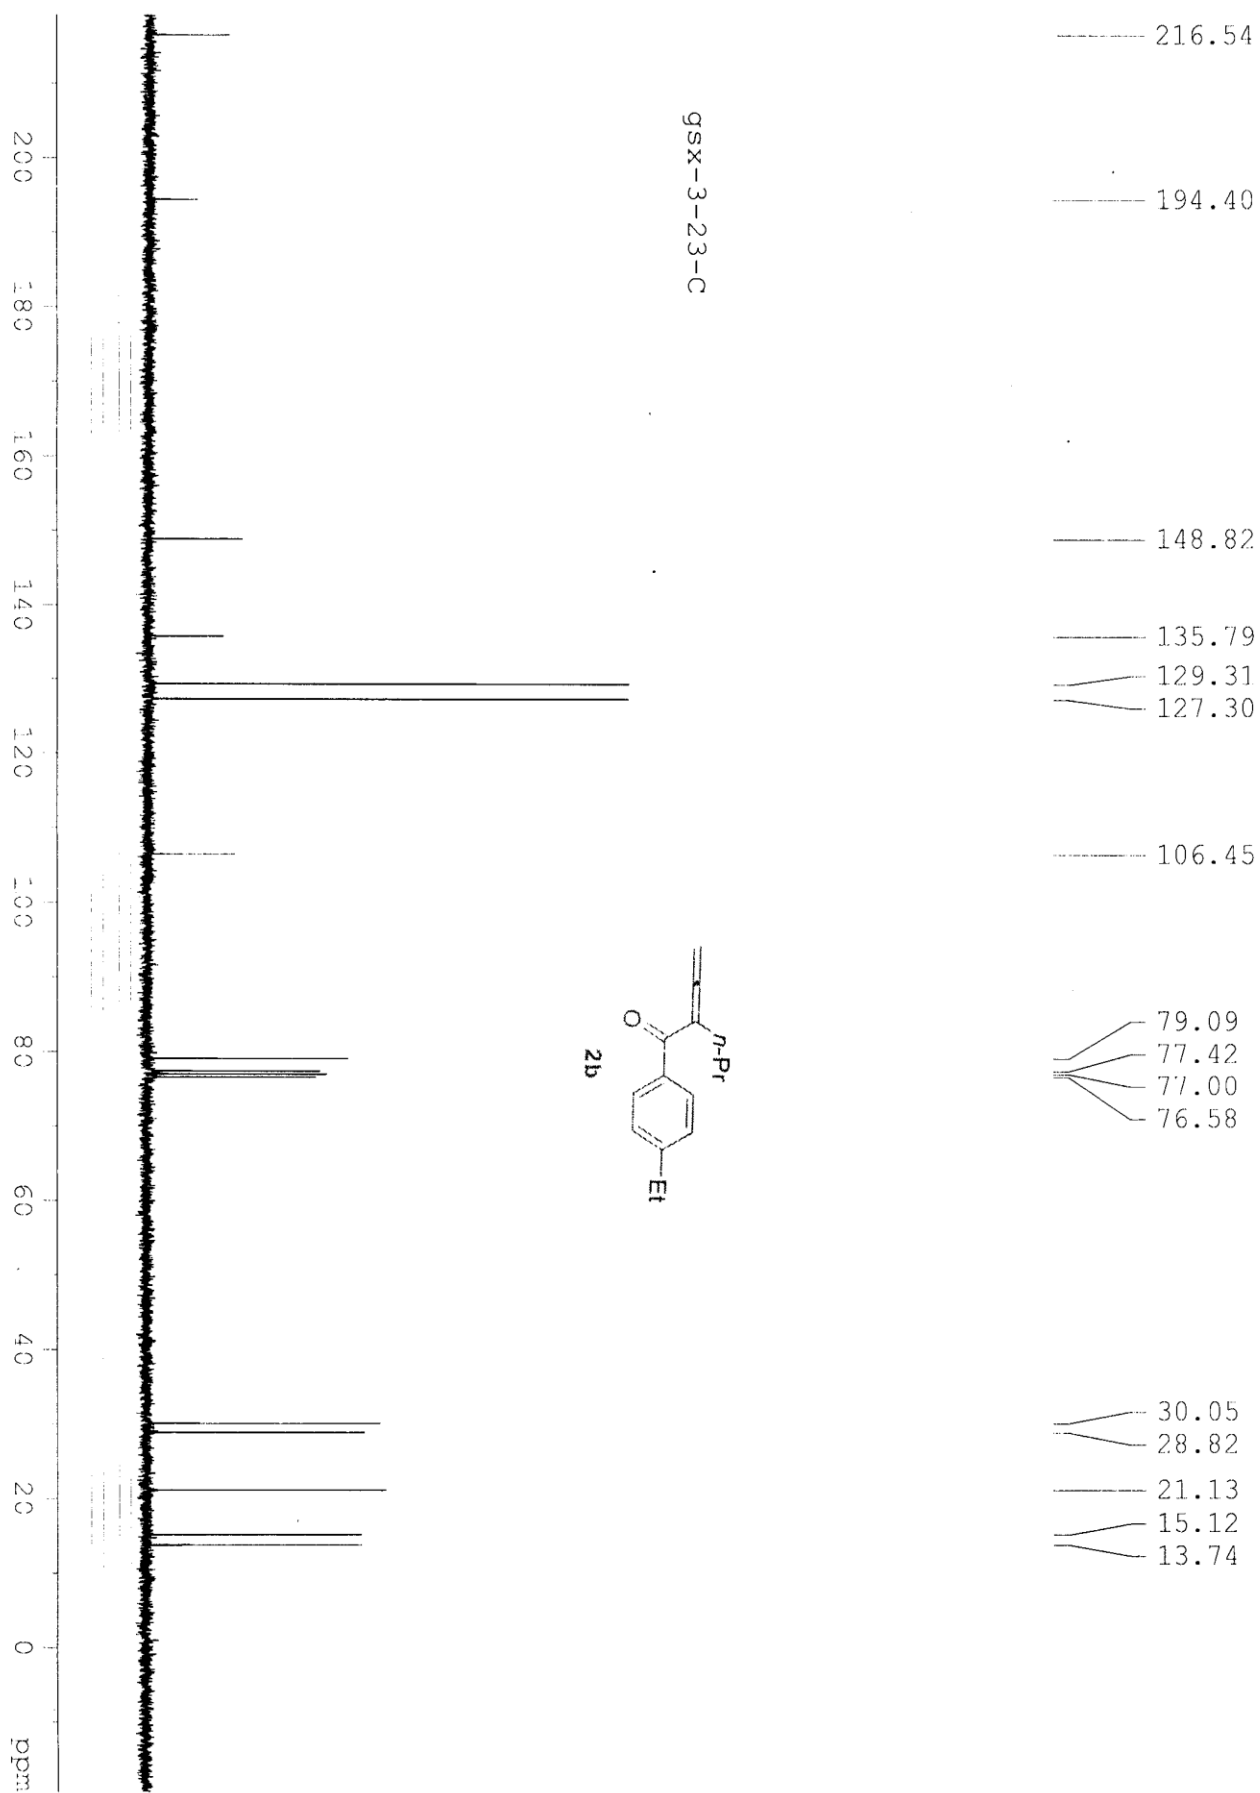

gsx-3-39

7.638  
7.609  
7.533  
7.505  
7.260

5.075  
5.066  
5.056

2.391  
2.382  
2.366  
2.357  
2.349  
2.342  
2.331  
2.322  
1.584  
1.559  
1.534  
1.509  
1.485  
1.460  
0.994  
0.970  
0.945

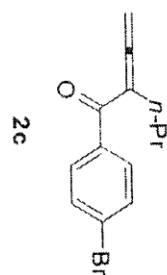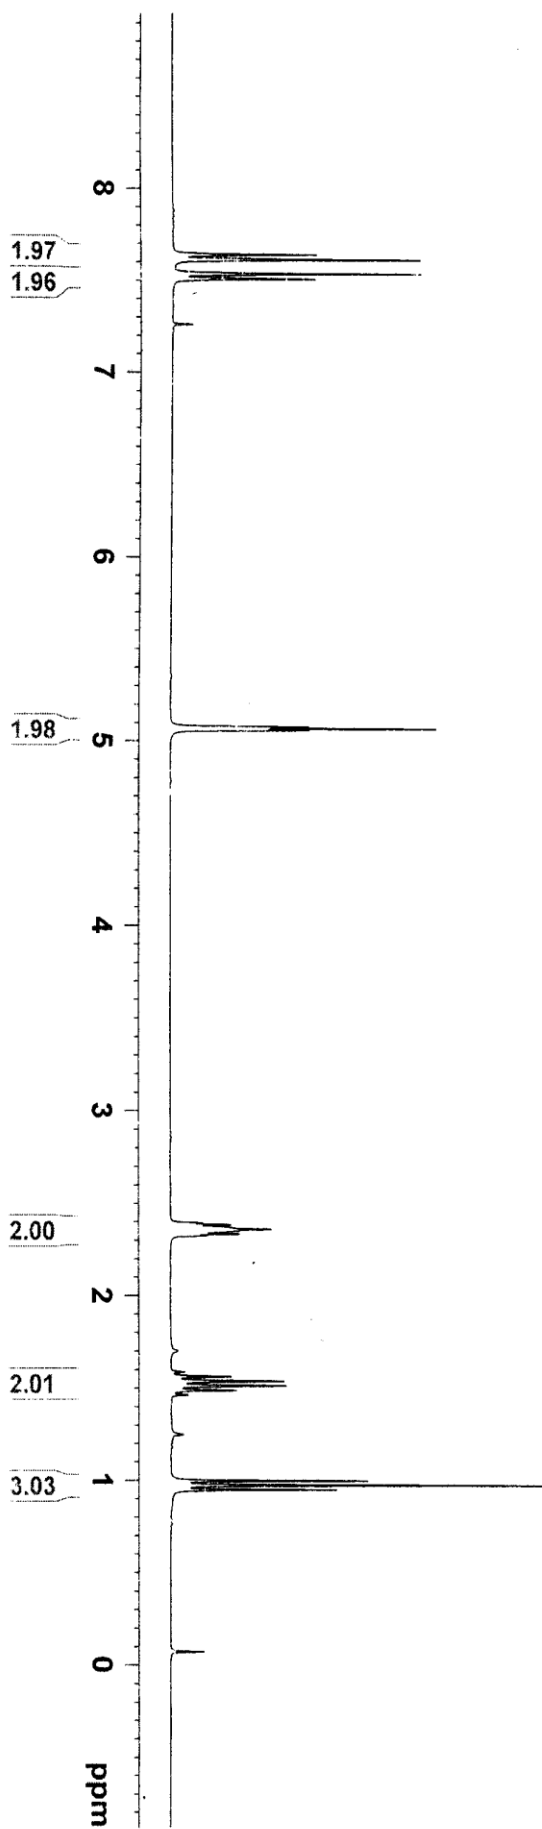

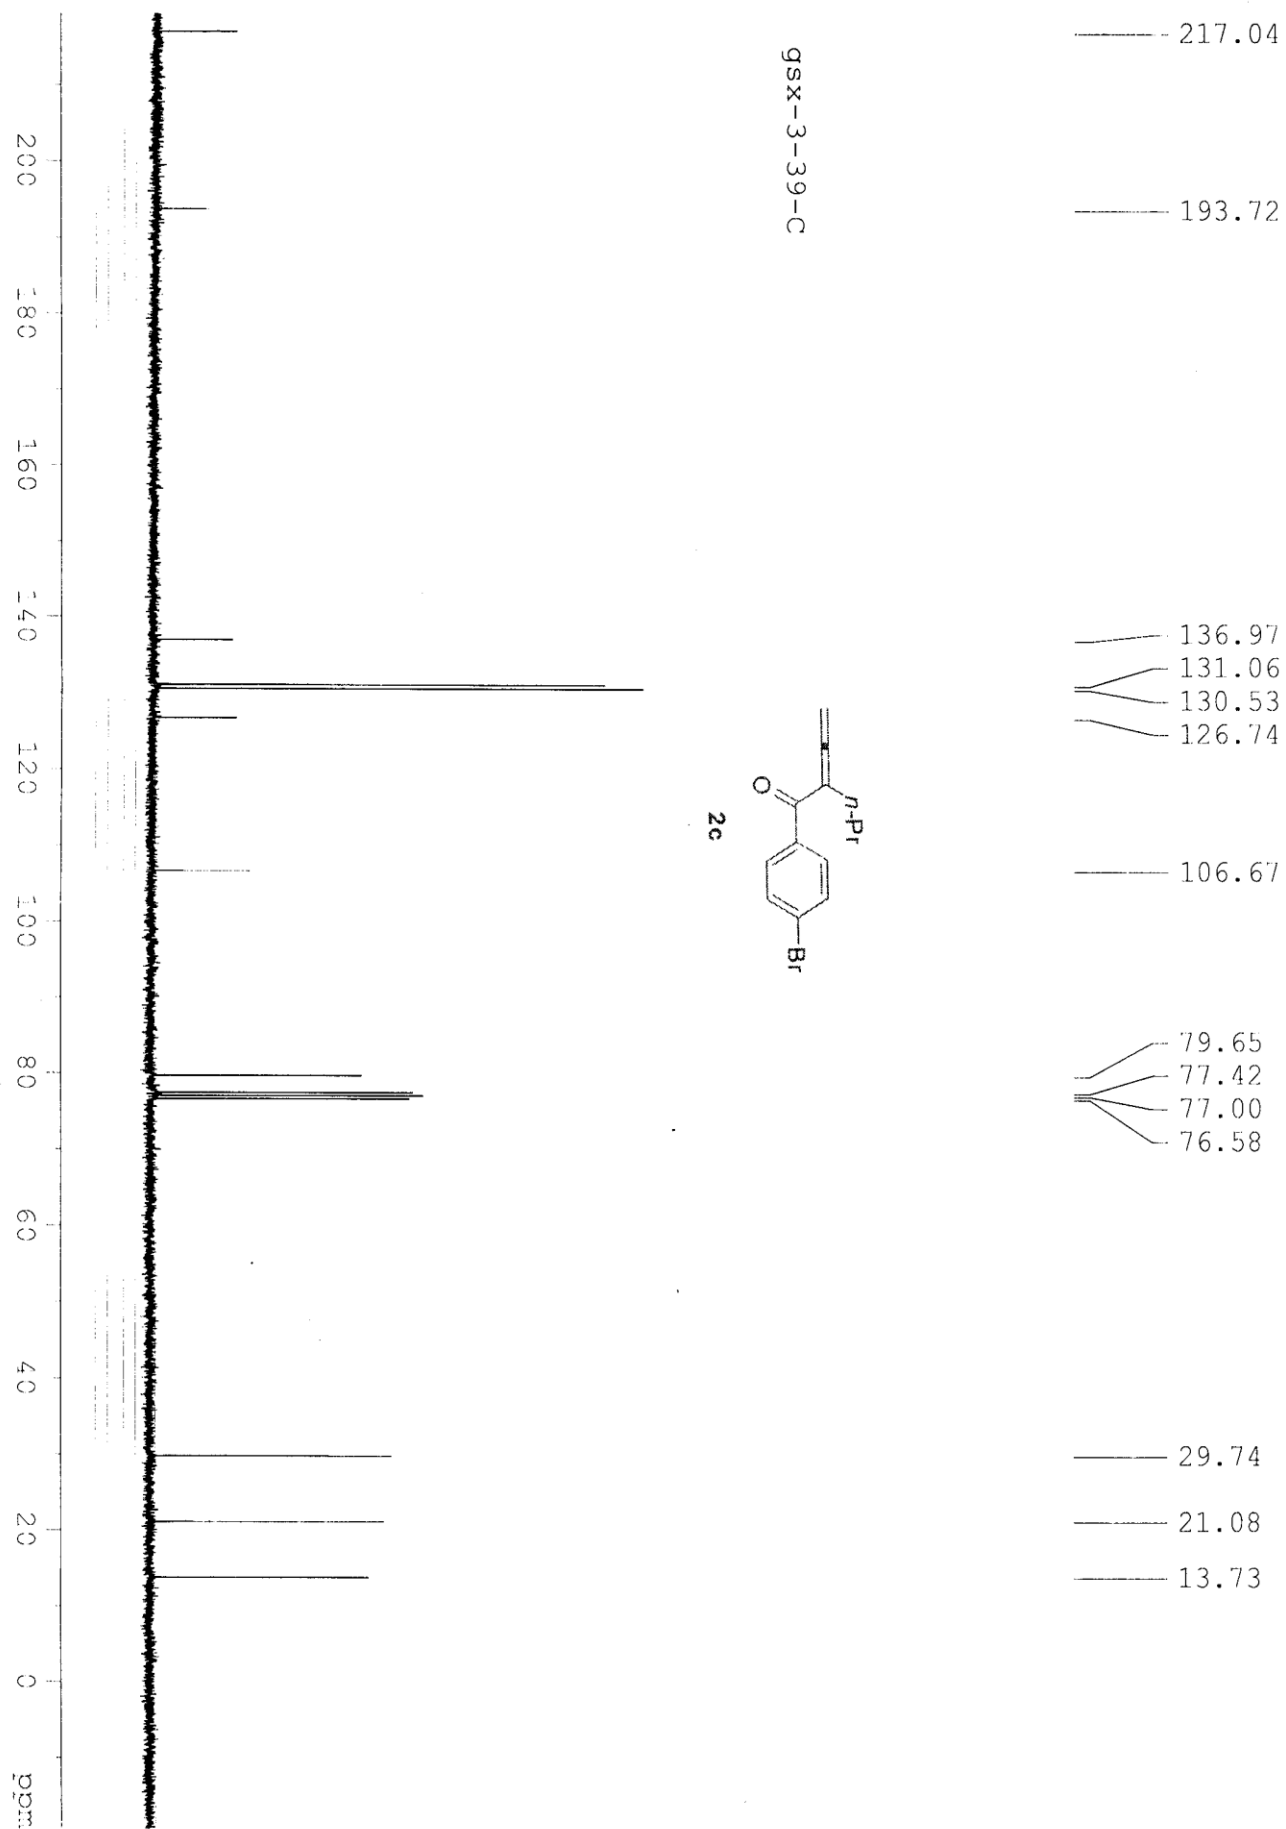

7.712  
7.684  
7.367  
7.339  
7.260

5.070  
5.062  
5.053

2.397  
2.373  
2.348  
1.533  
1.512  
1.488  
1.463  
1.439  
1.384  
1.356  
1.336  
1.310  
1.291  
1.246  
0.899  
0.879  
0.857

gsx-3-14

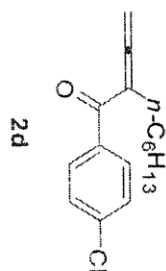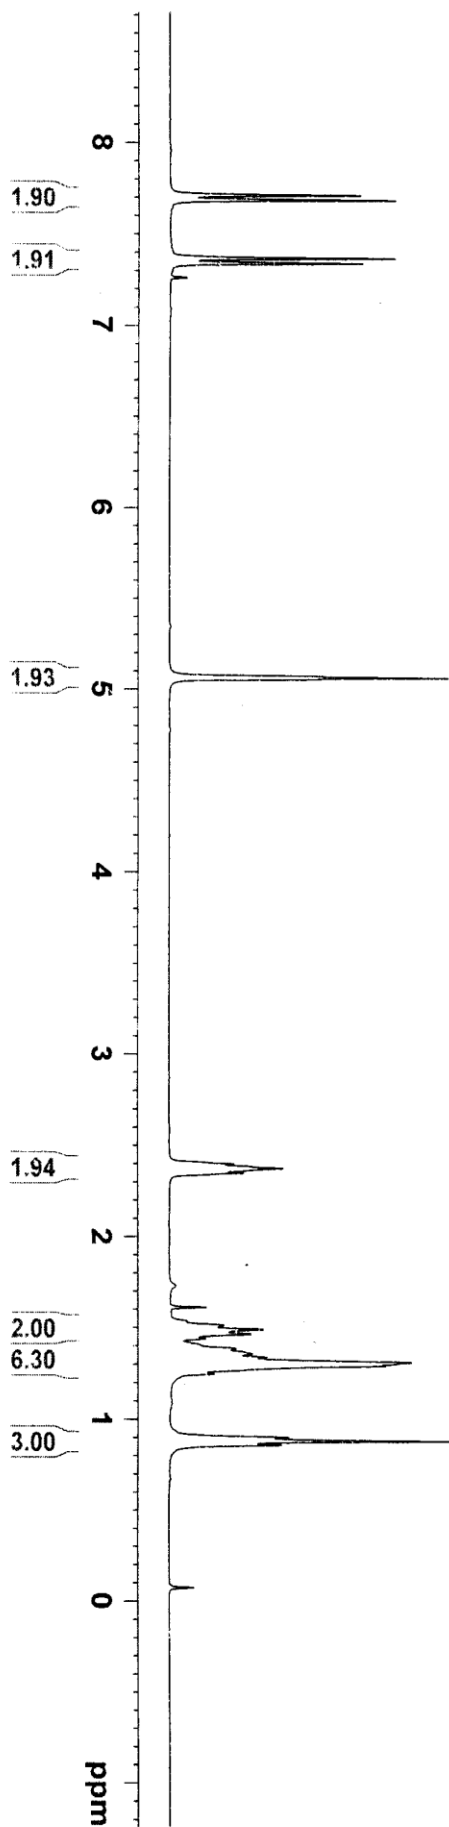



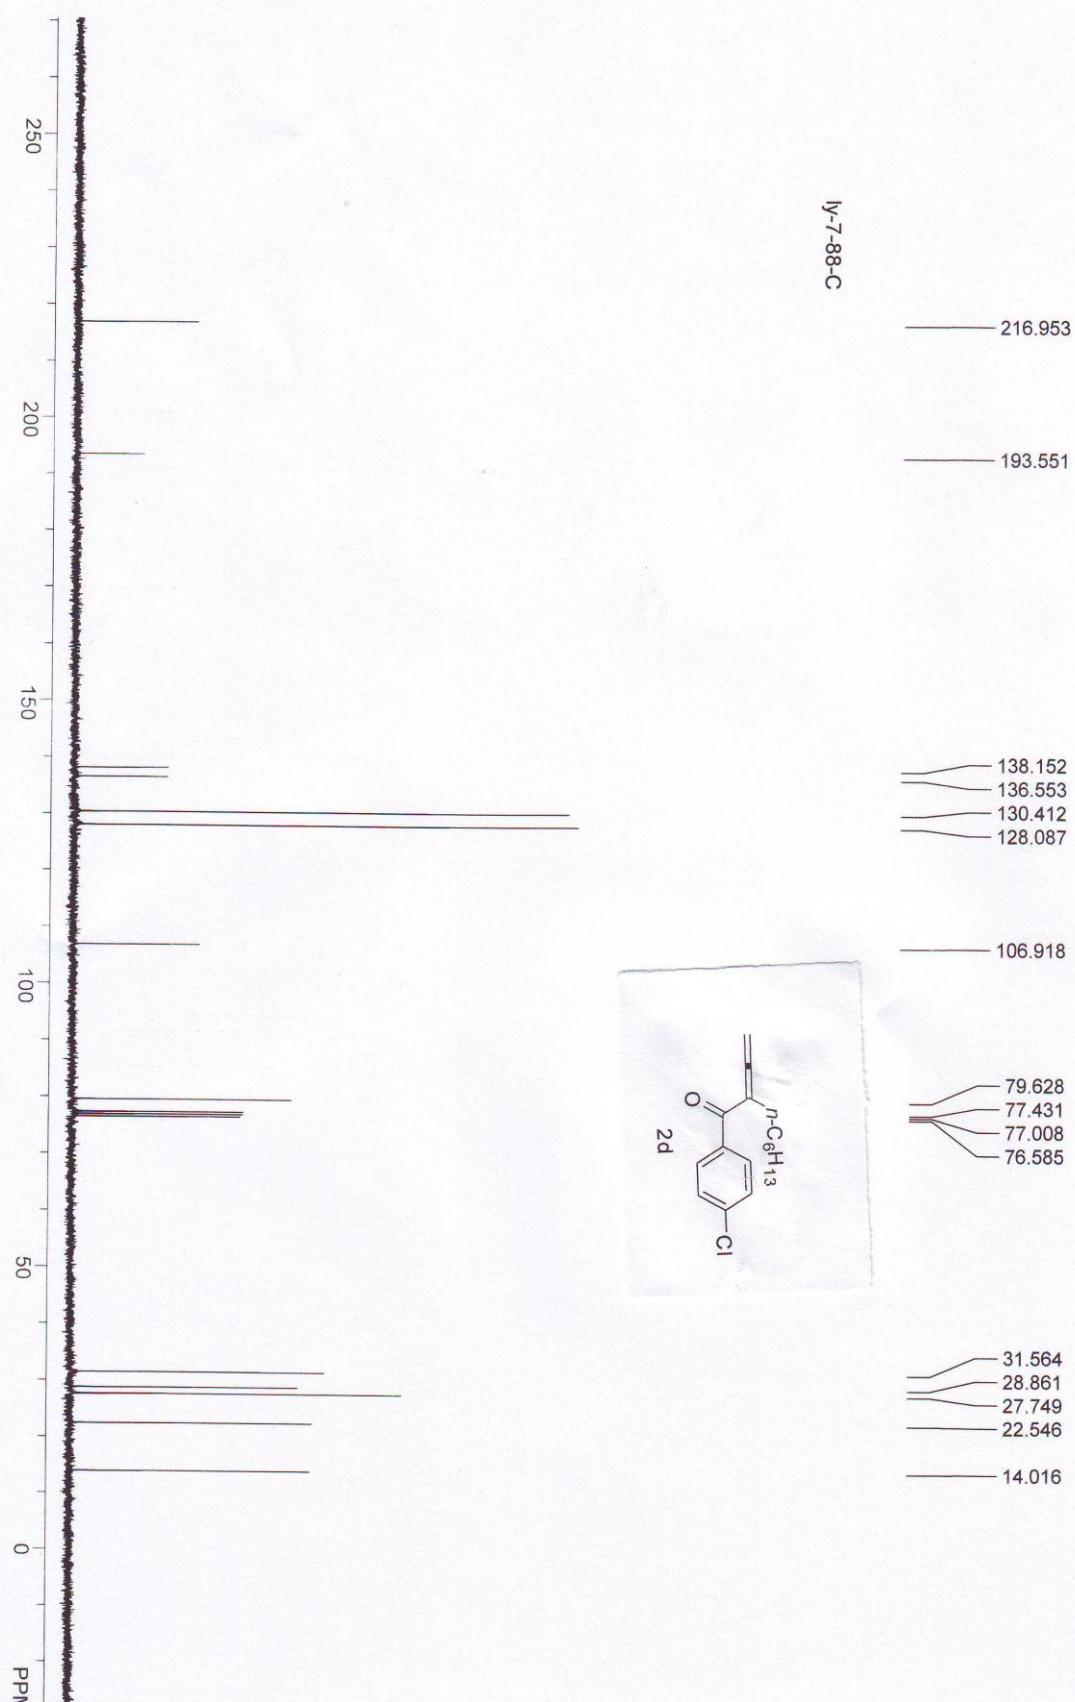

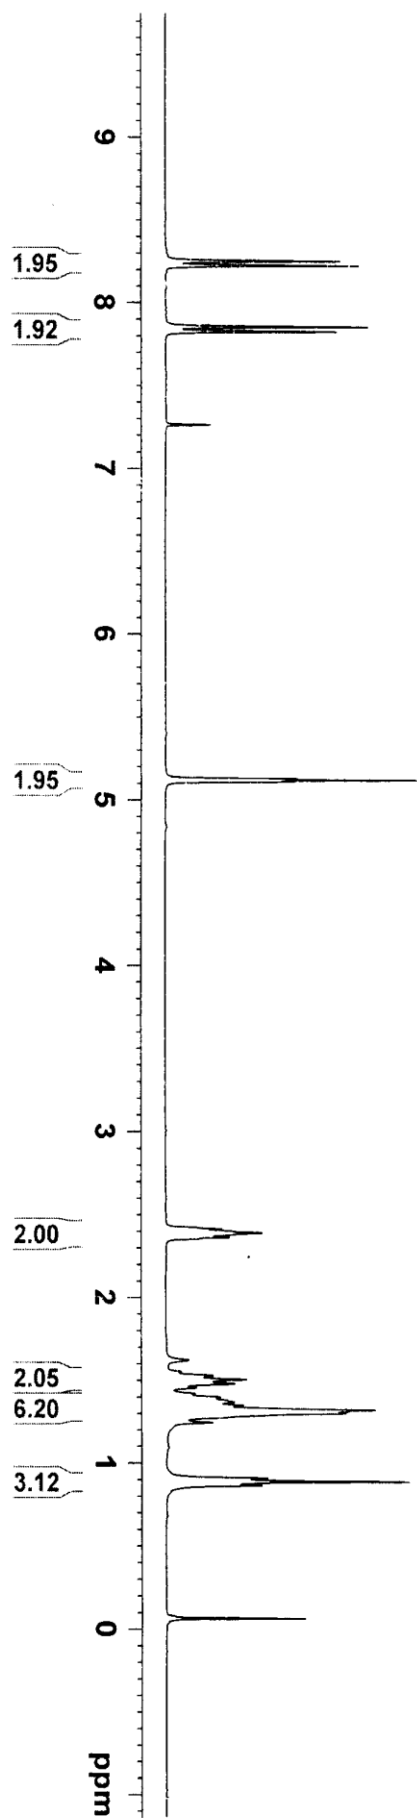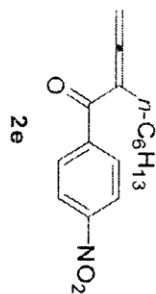

8.251  
8.222  
7.852  
7.823

7.260

5.126  
5.117  
5.107

2.414  
2.390  
2.364  
2.355  
1.551  
1.529  
1.505  
1.479  
1.455  
1.419  
1.398  
1.368  
1.348  
1.320  
1.312  
1.300  
1.243  
0.907  
0.886  
0.864

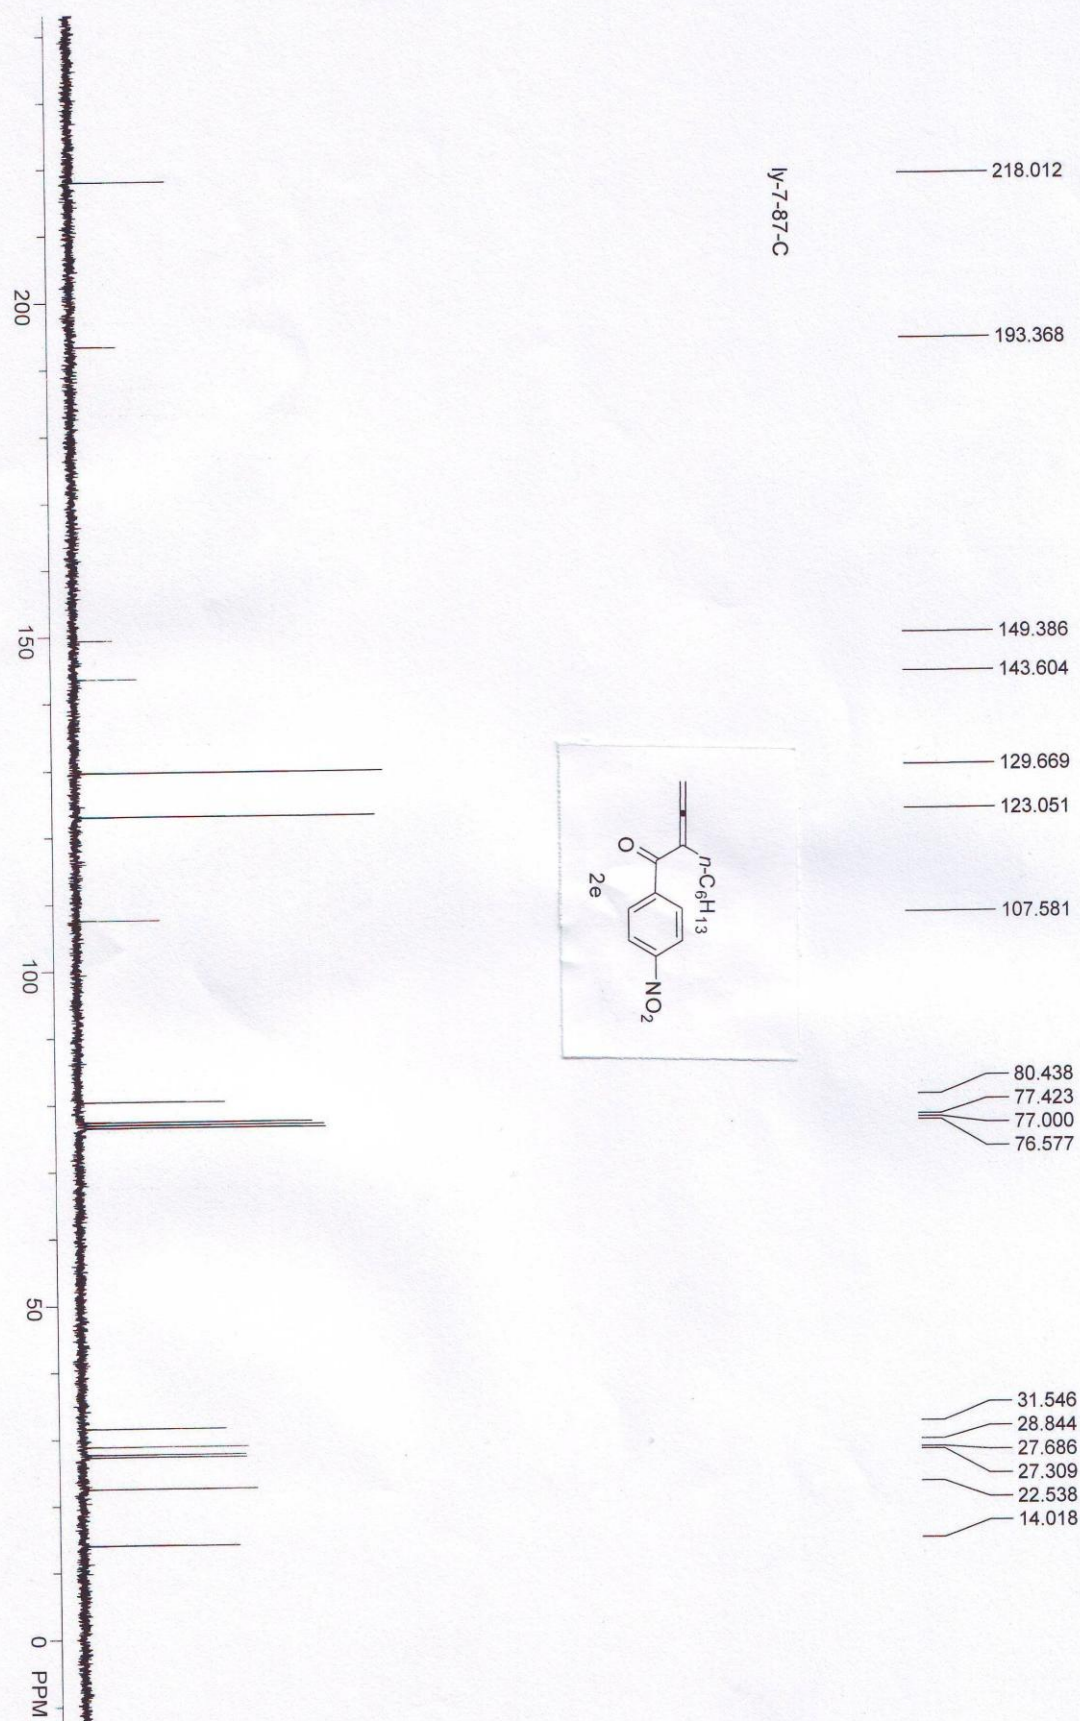

gsx-5-2

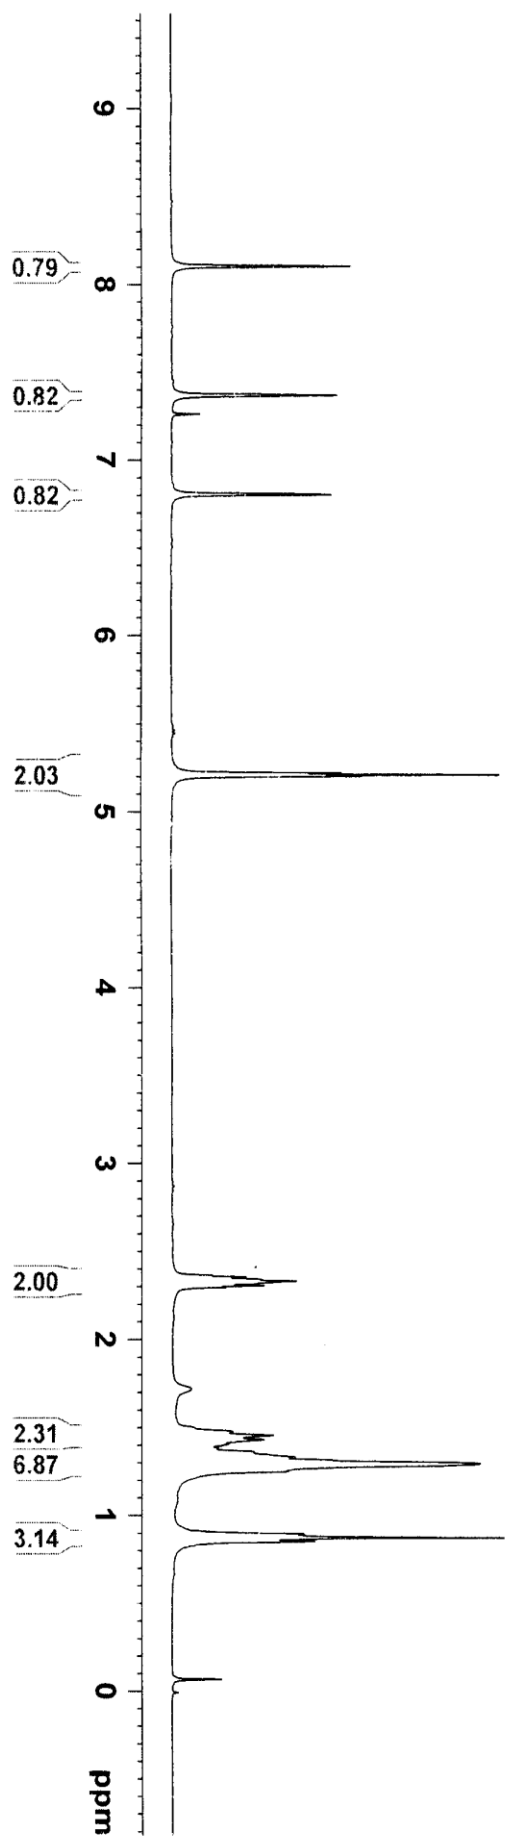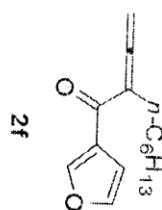



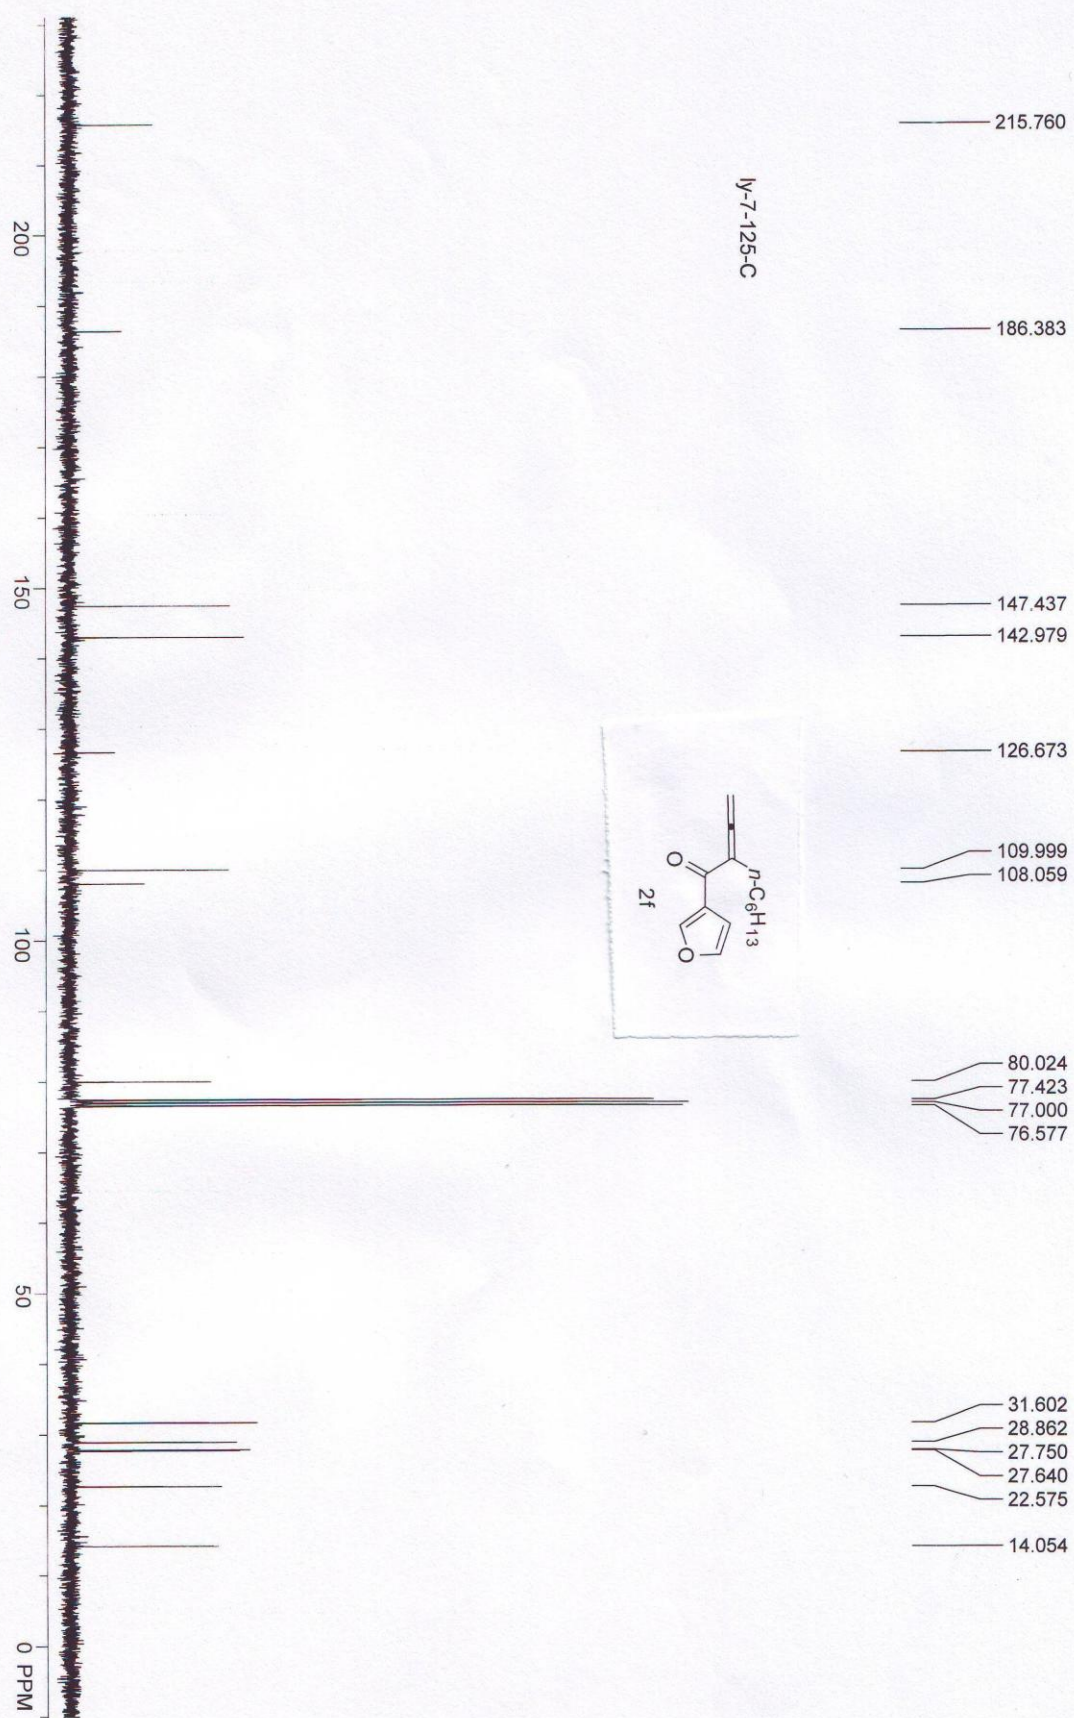

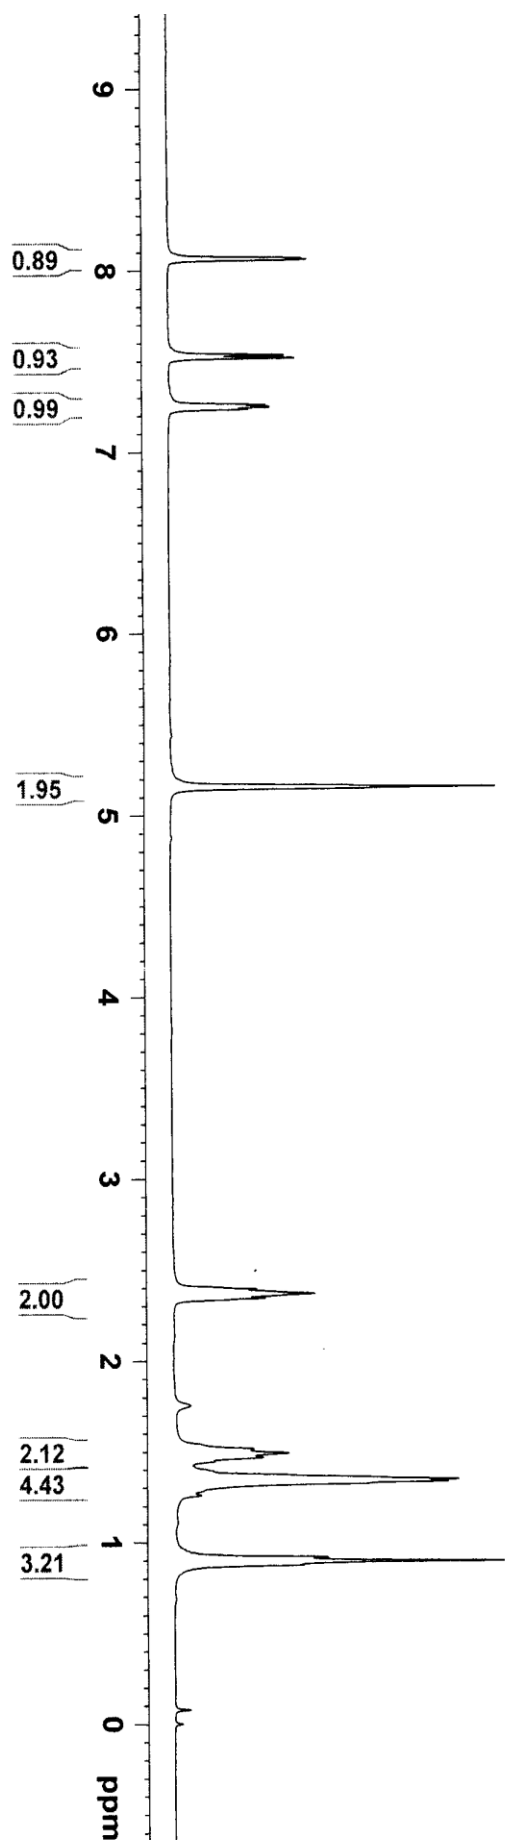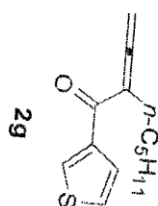

gsx-4-145

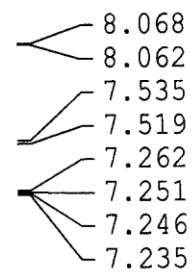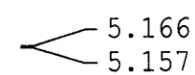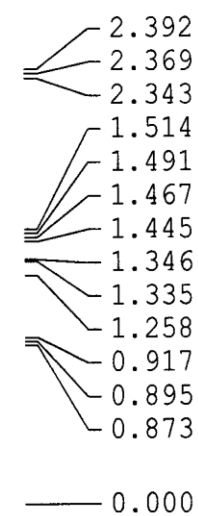

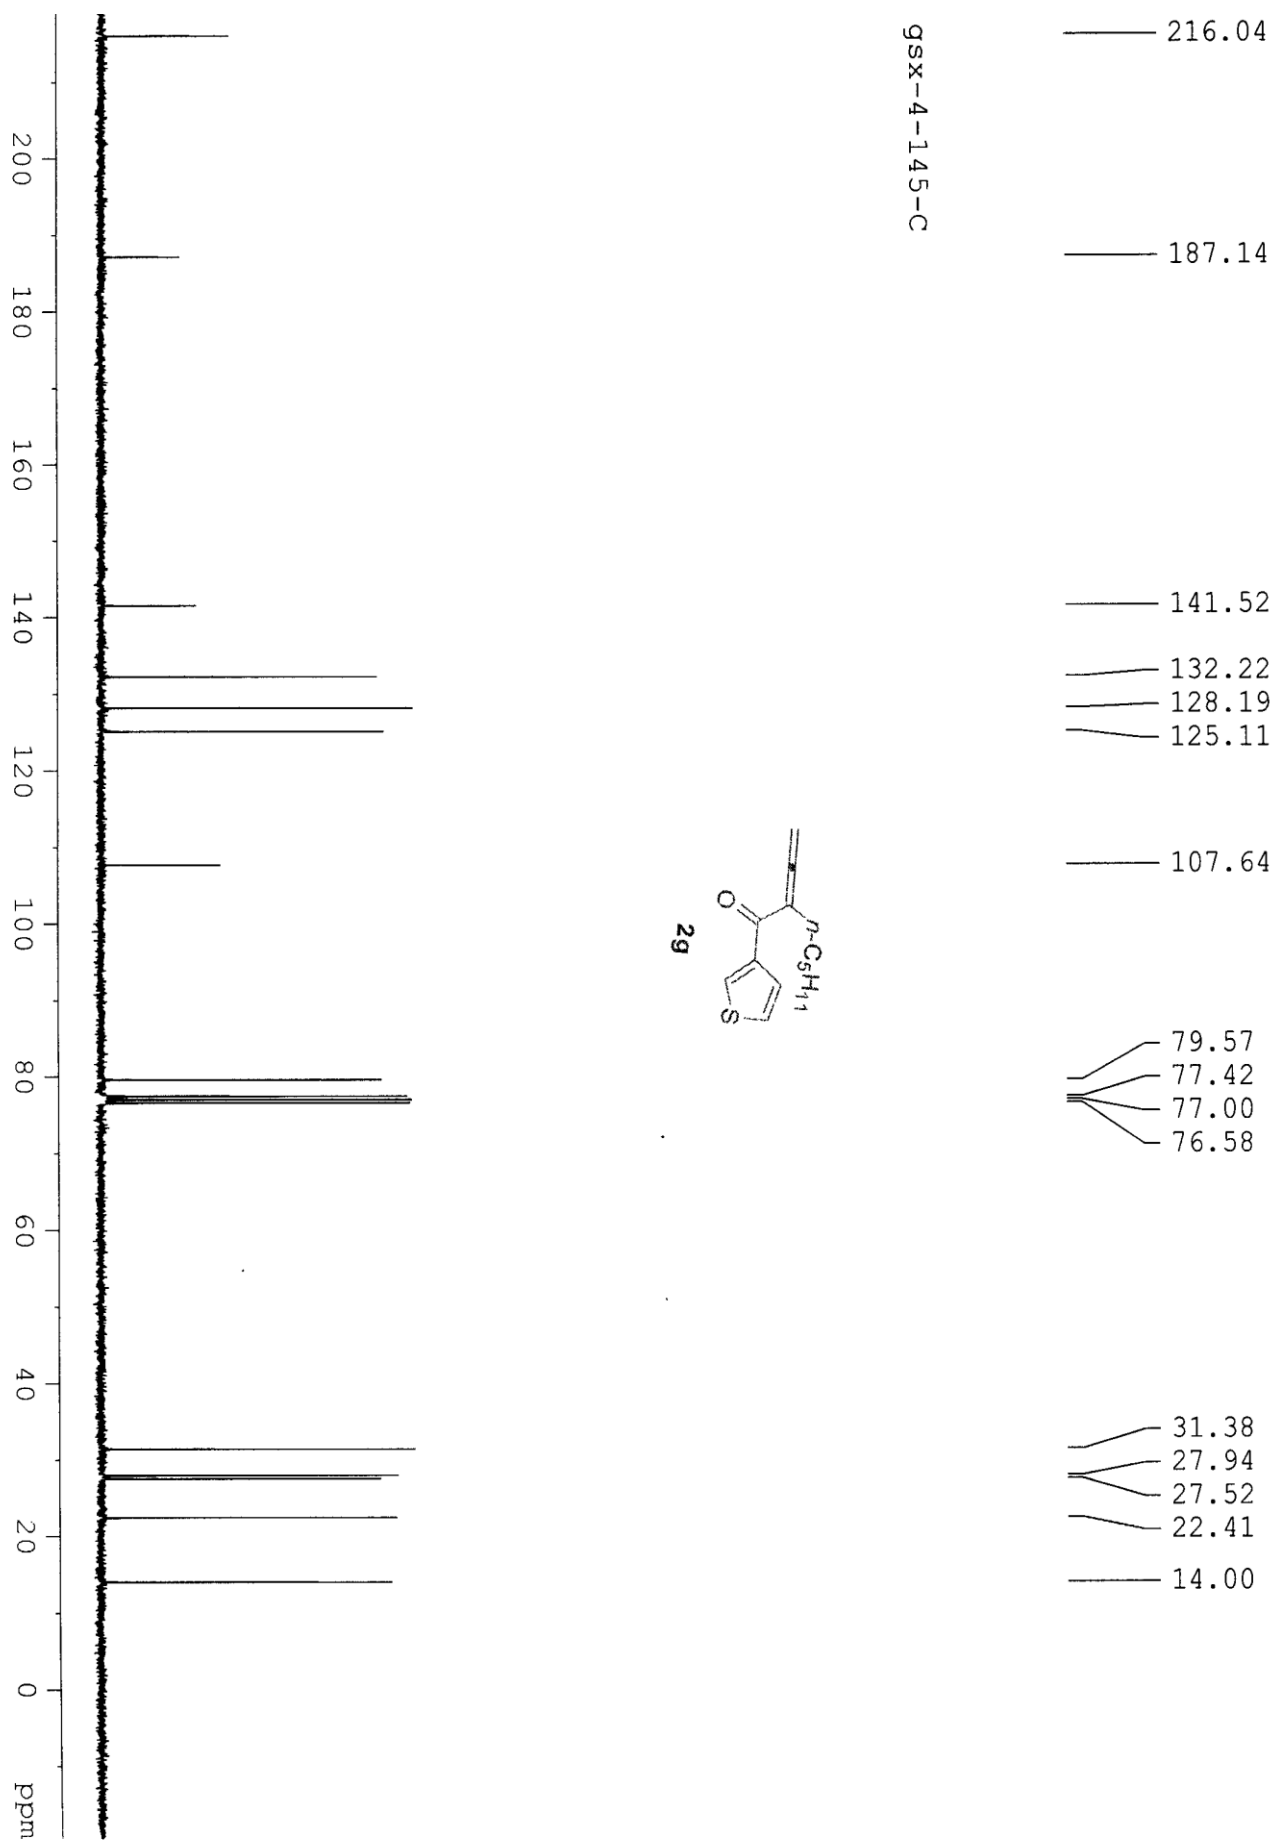

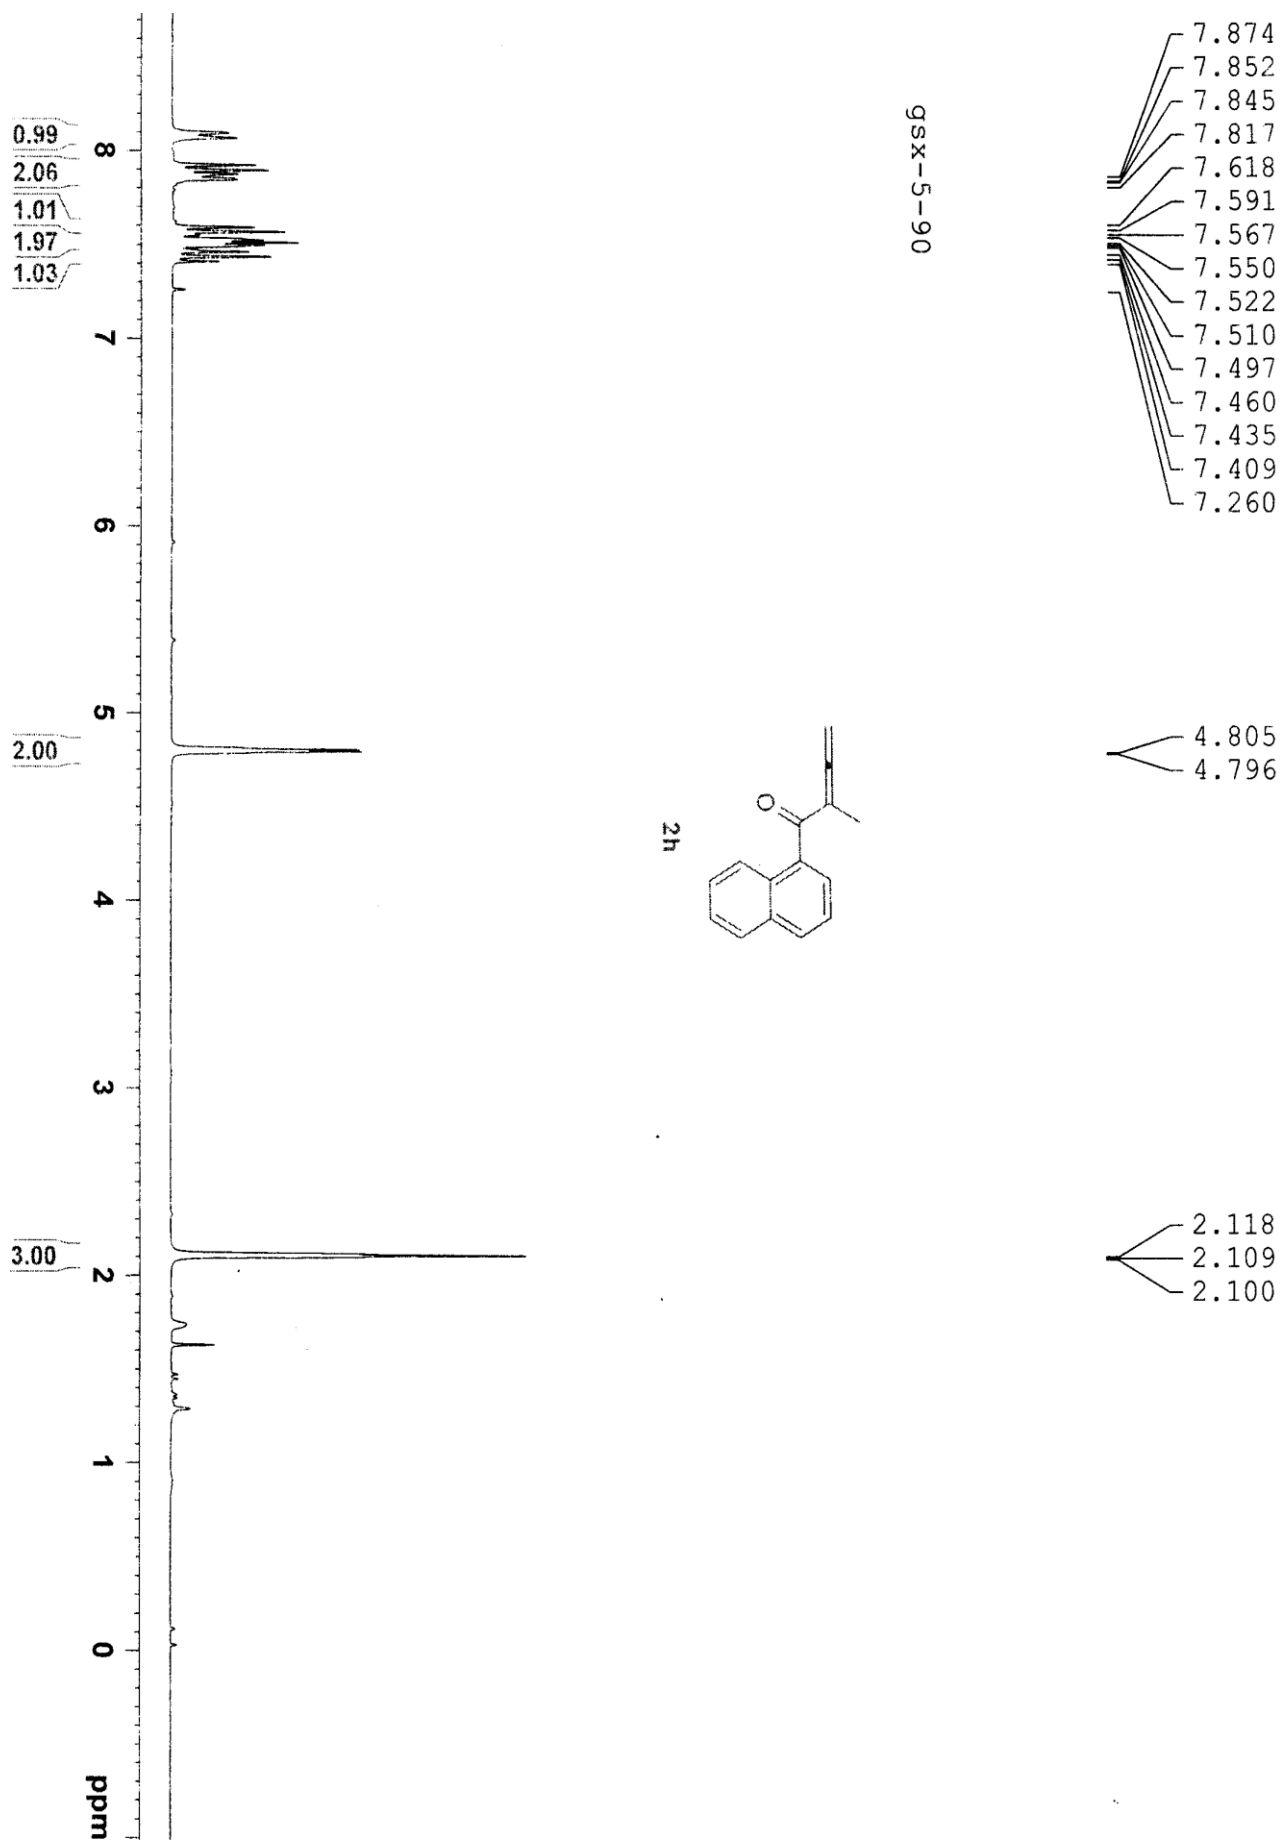



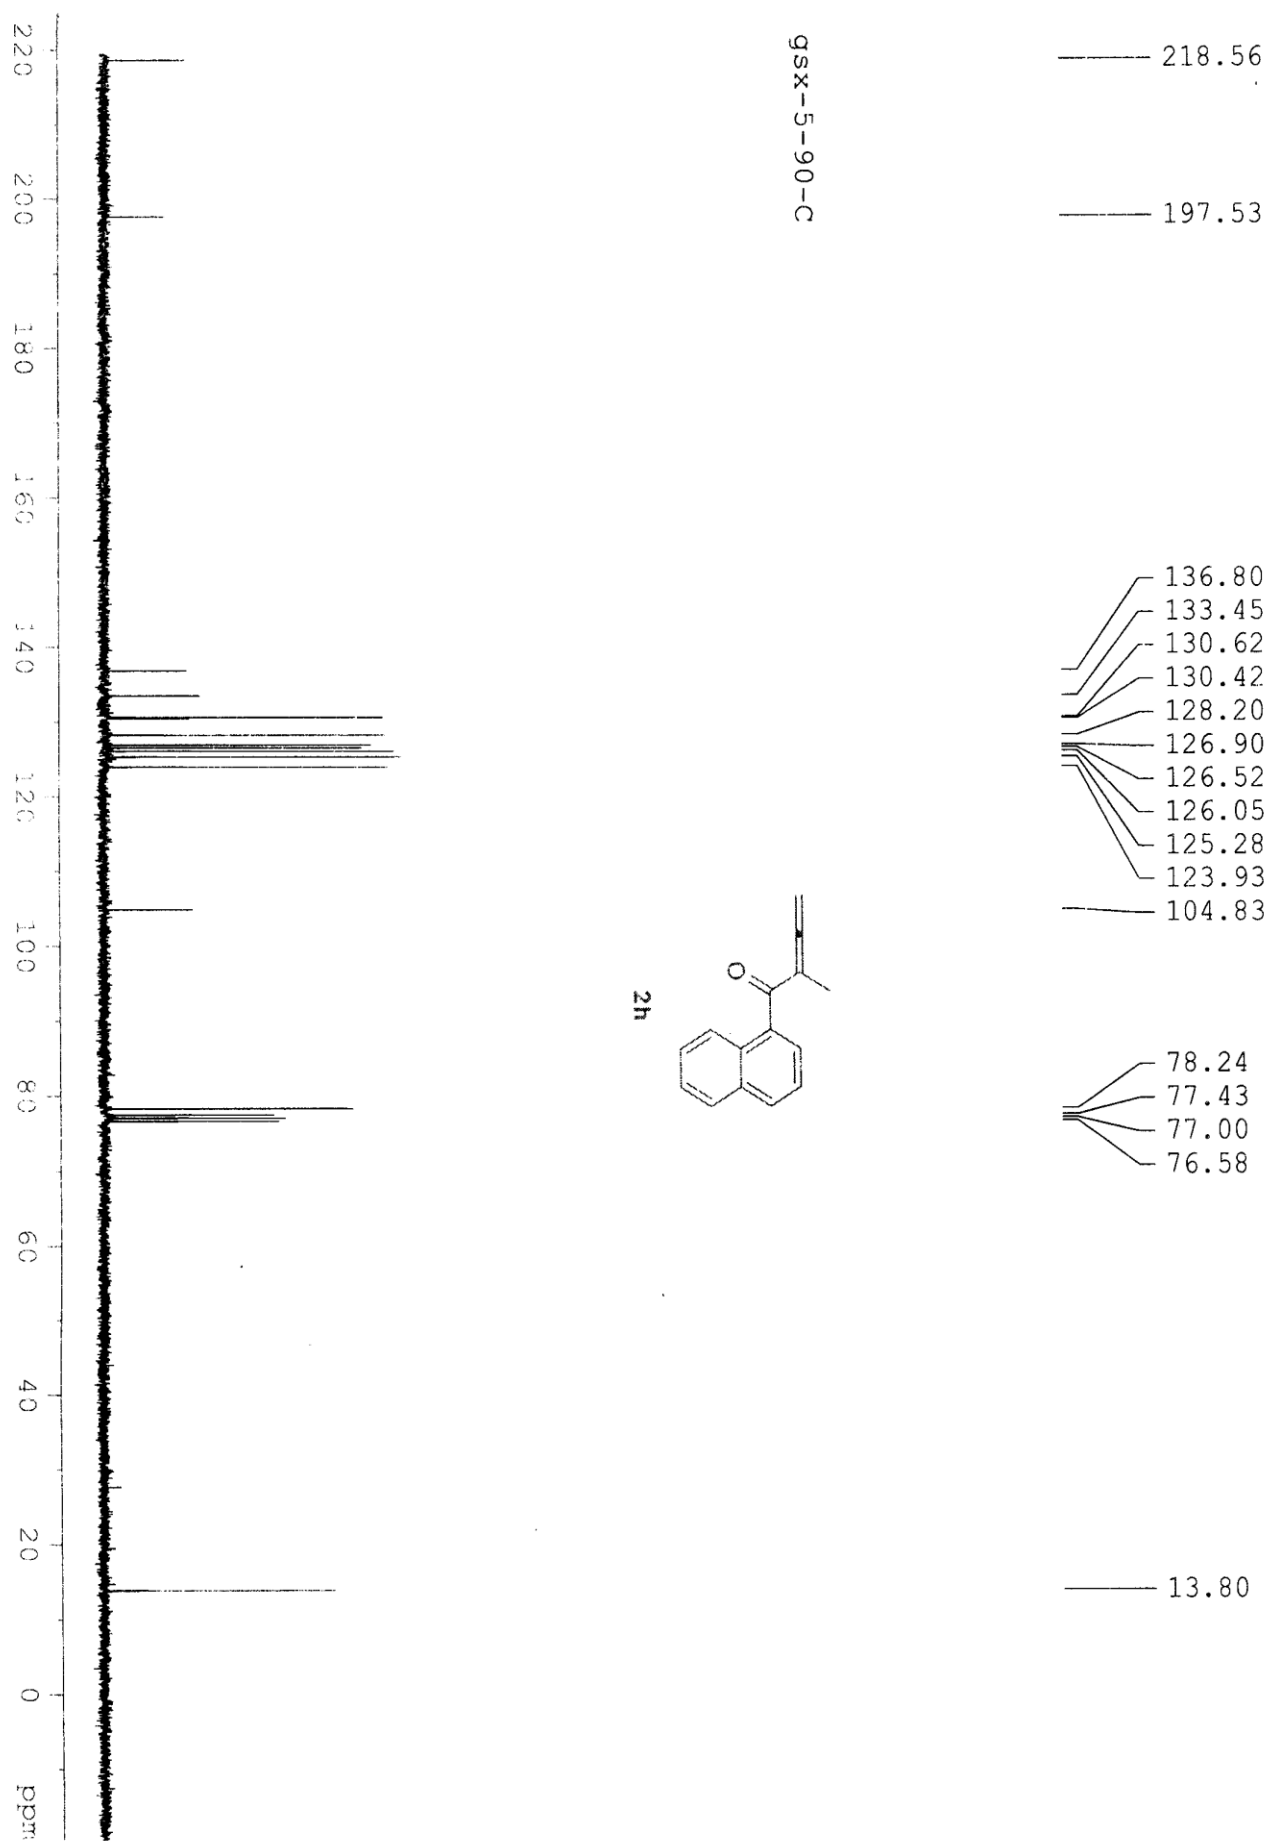

gsx-5-35

7.790  
7.764  
7.527  
7.503  
7.479  
7.418  
7.393  
7.368  
7.260

5.971  
5.948  
5.937  
5.915  
5.892  
5.881  
5.858  
5.836  
5.192  
5.135  
5.093  
5.070

3.186  
3.183  
3.177  
3.173  
3.165

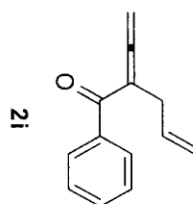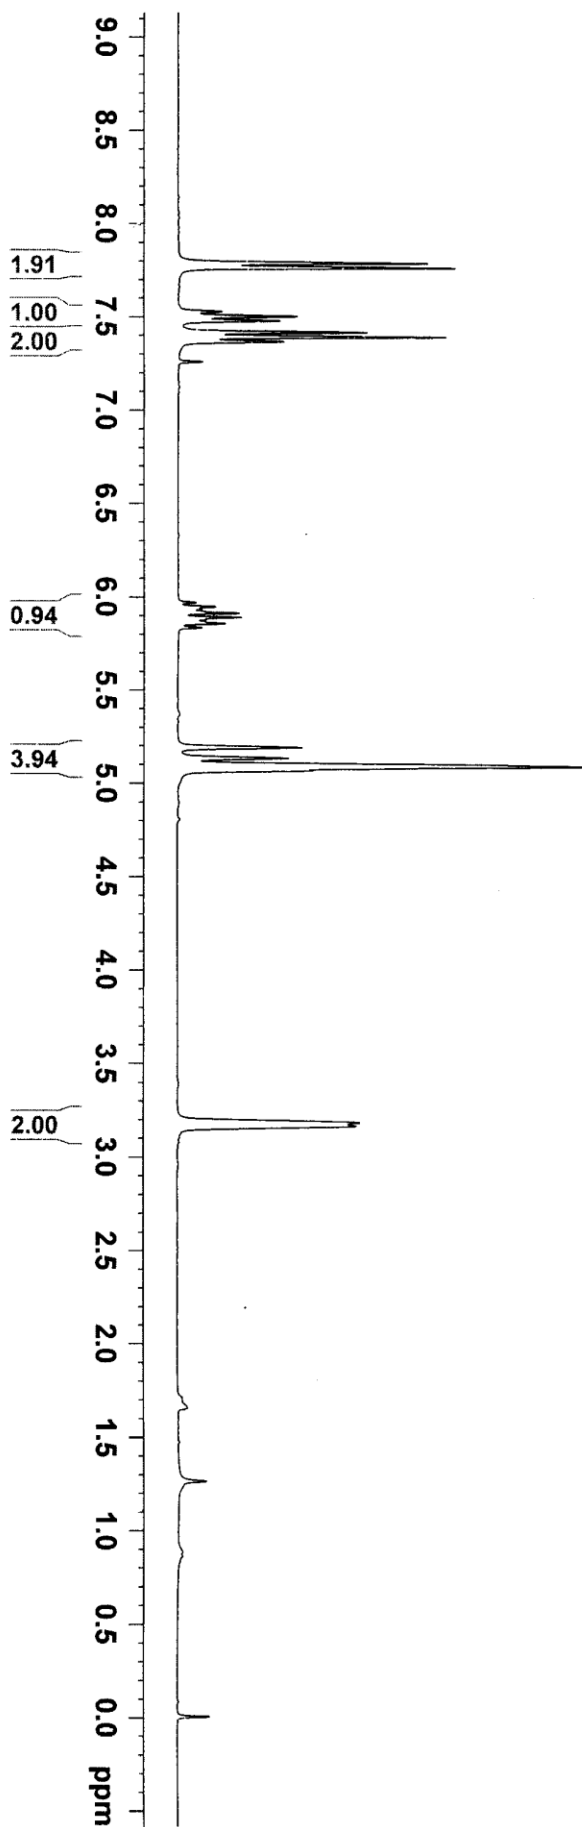

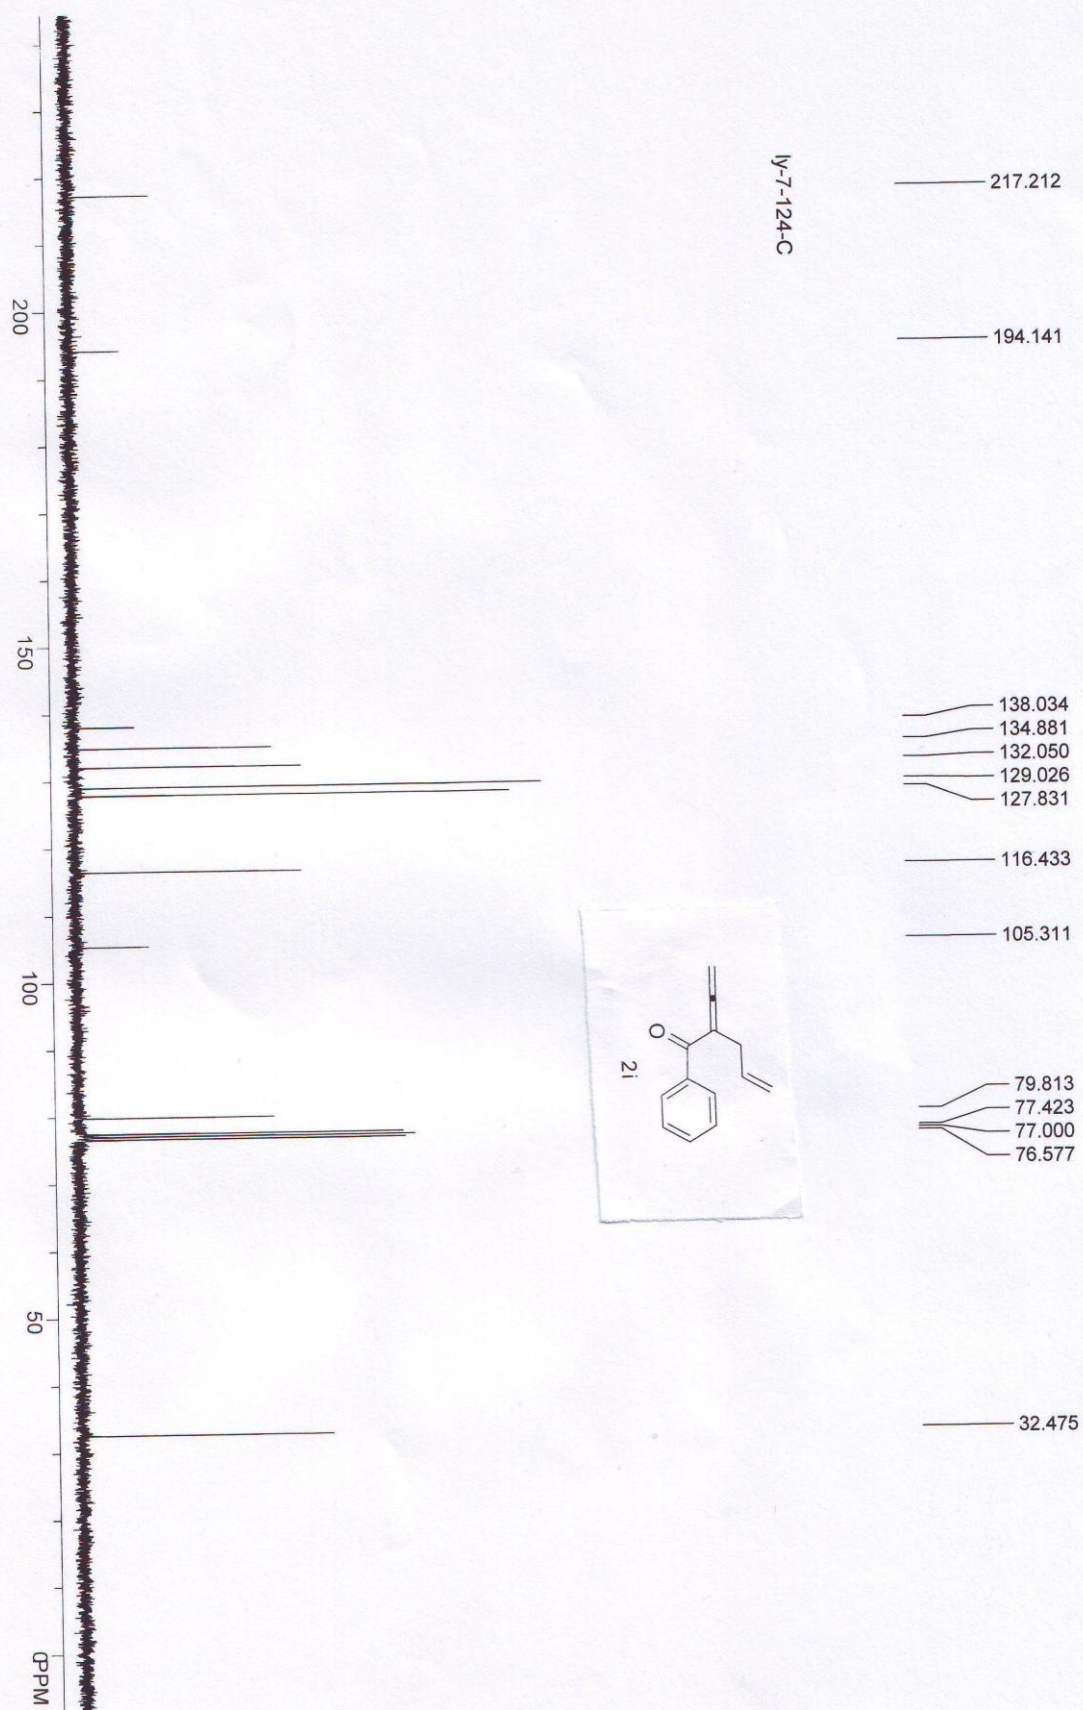

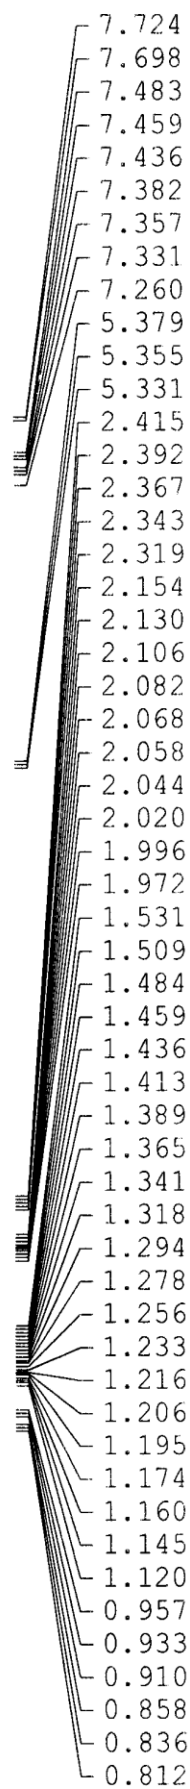

gsx-5-91

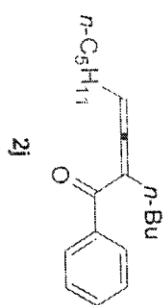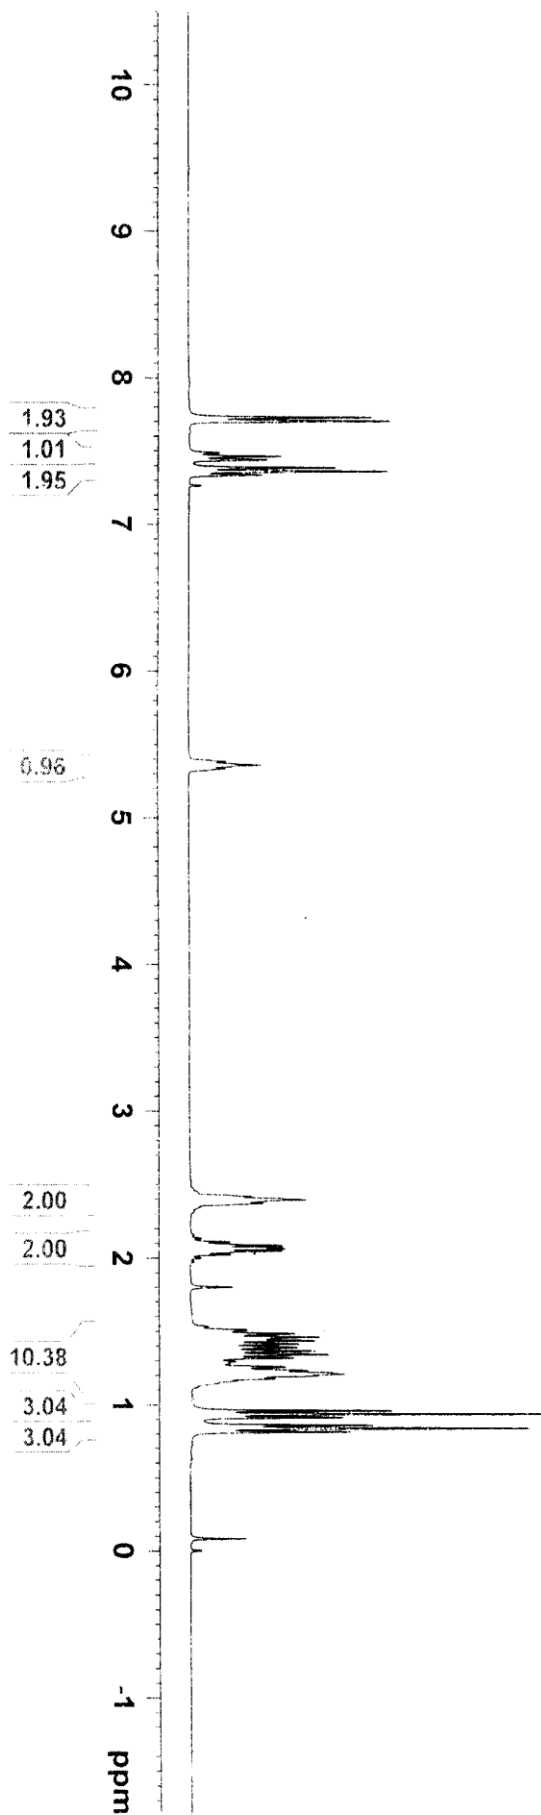

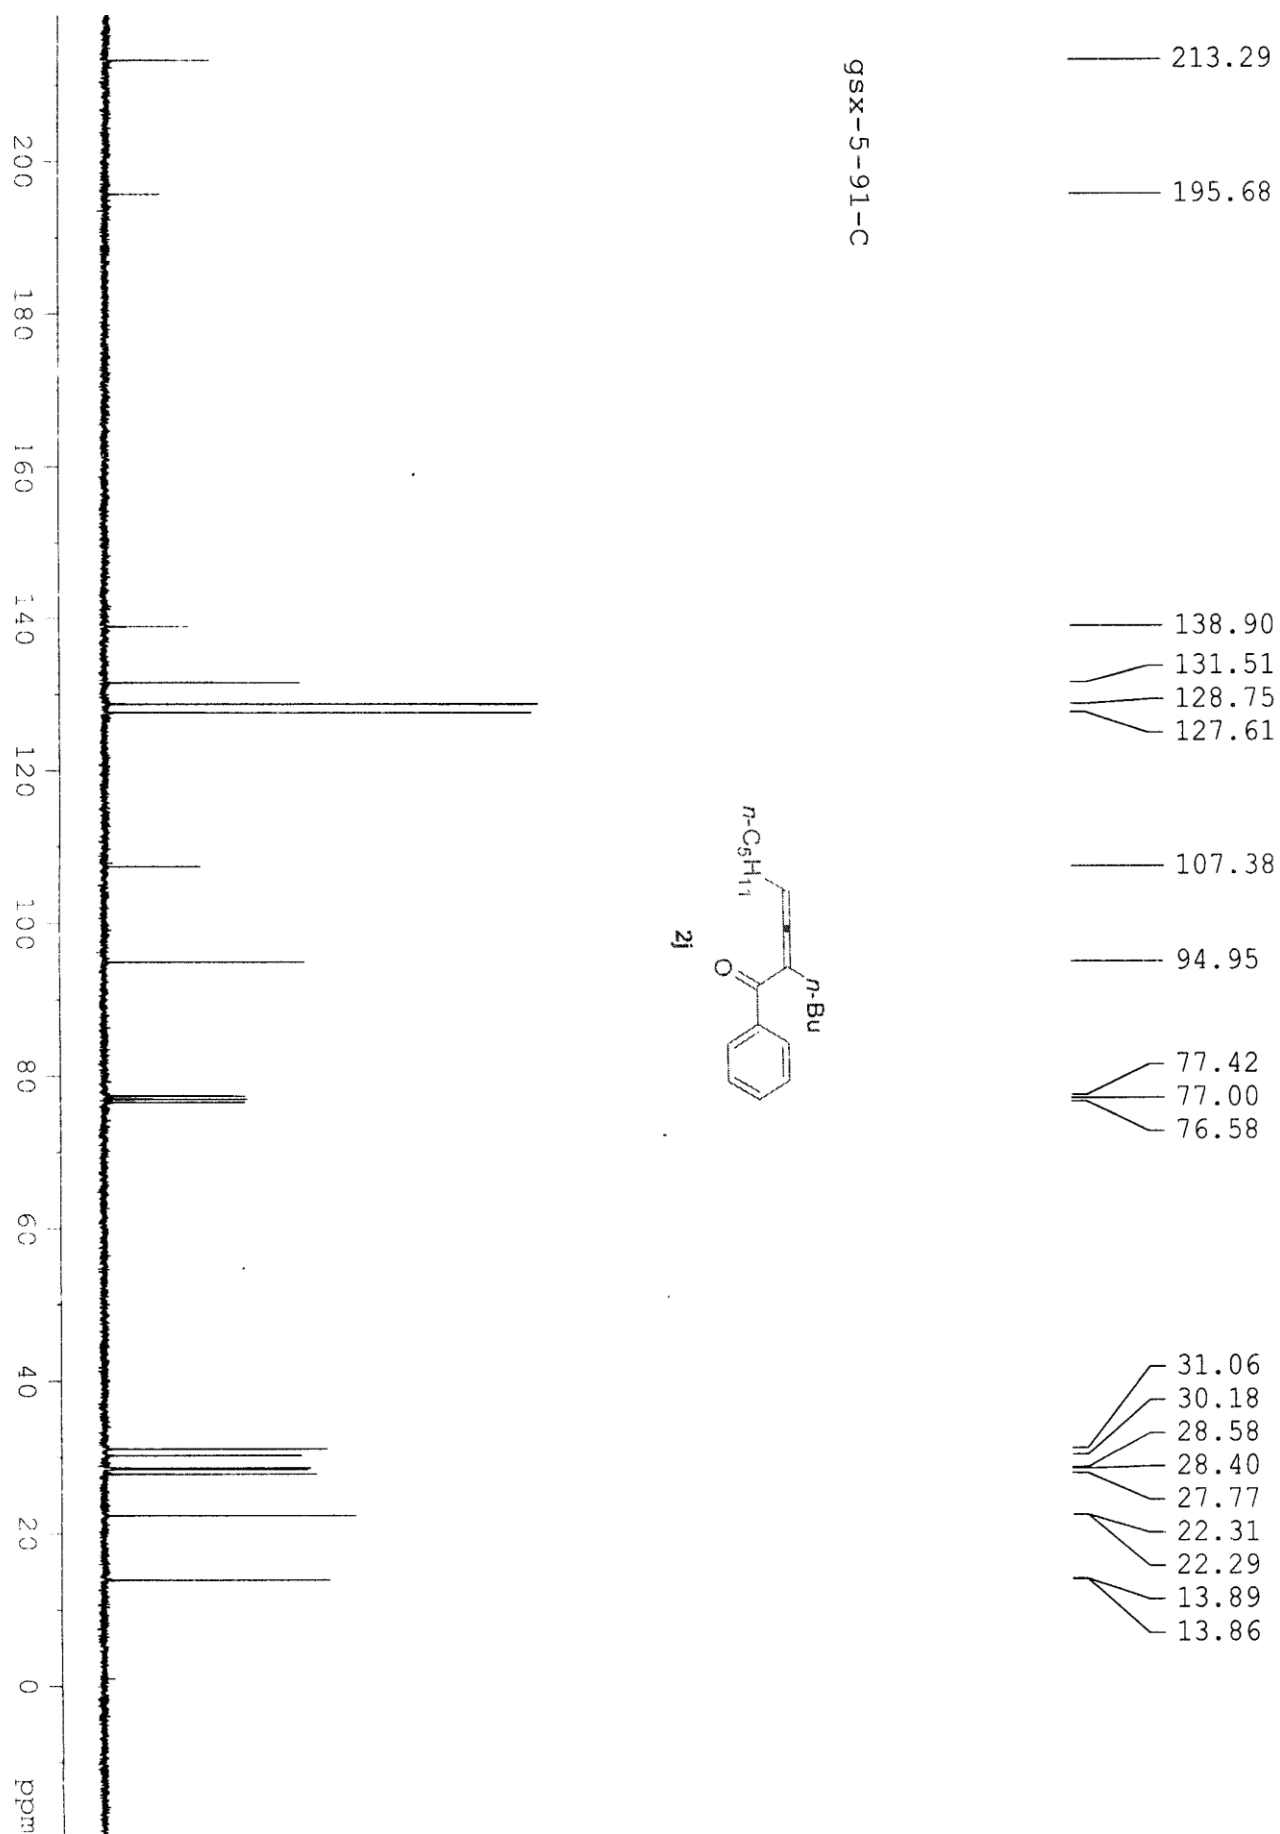

7.774  
7.749  
7.521  
7.497  
7.472  
7.413  
7.389  
7.363  
7.260

gsx-3-190

5.048

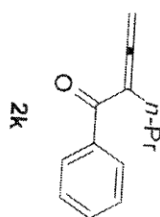

2.411  
2.386  
2.363  
1.608  
1.583  
1.558  
1.534  
1.509  
1.484  
1.013  
0.988  
0.964

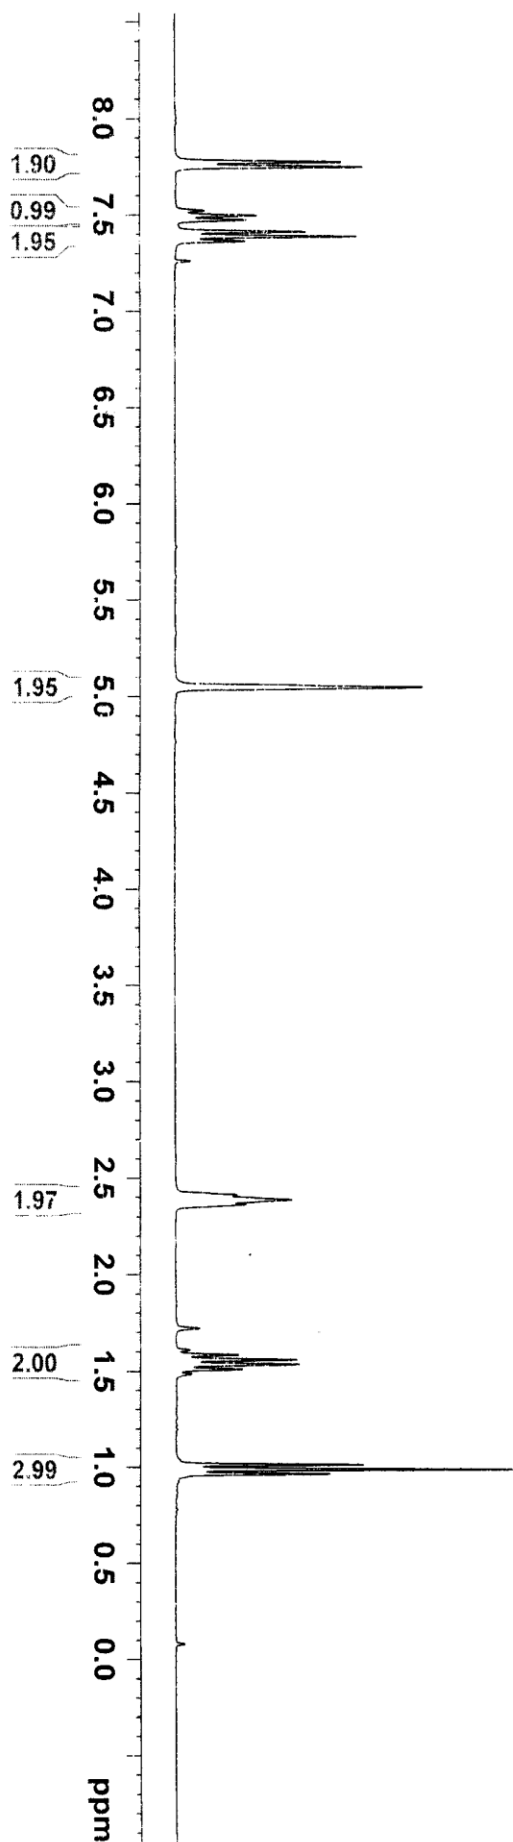

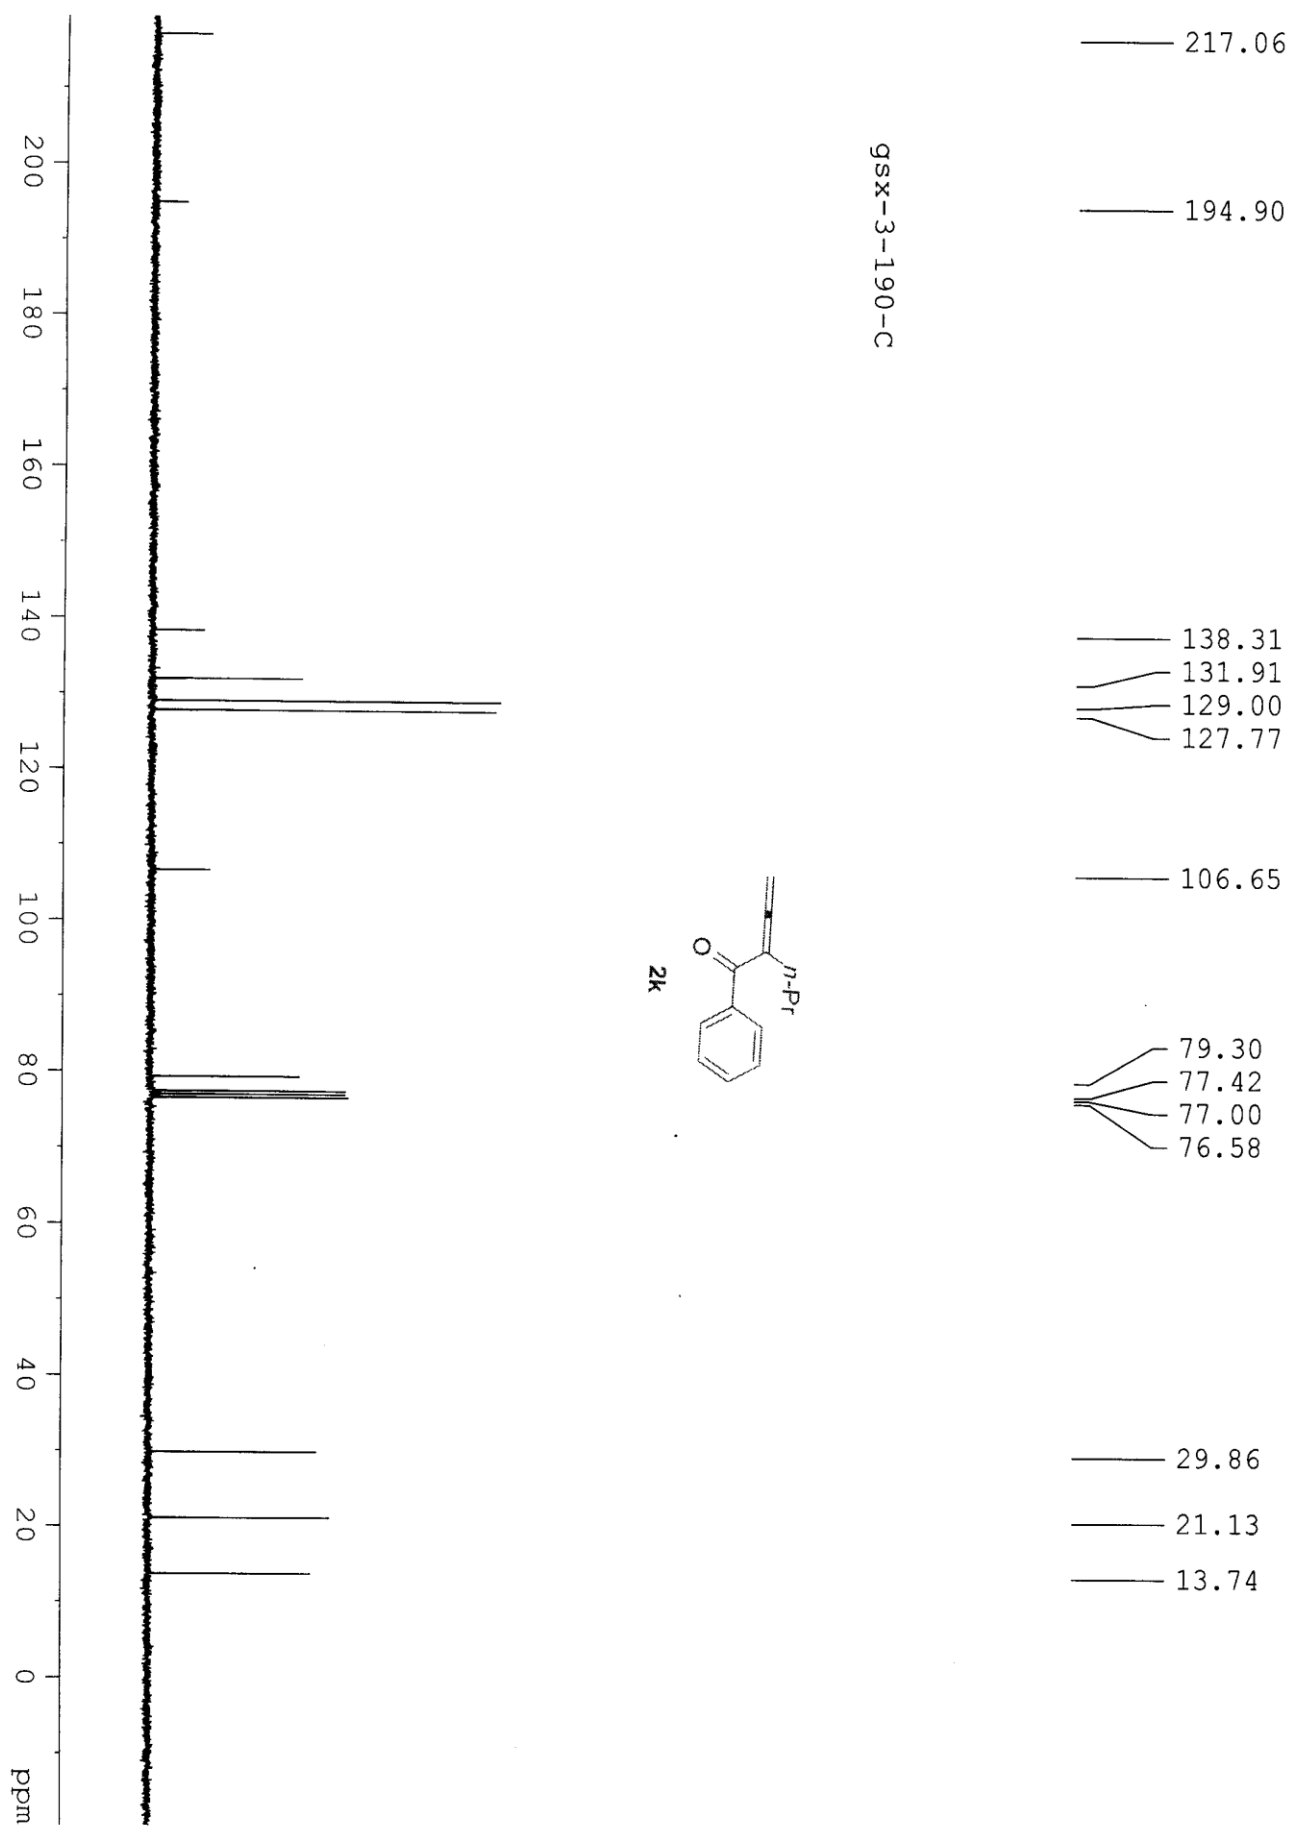

7.260

5.146  
5.137

2.642  
2.618  
2.593  
2.158  
2.136  
2.111  
1.585  
1.561  
1.536  
1.511  
1.485  
1.455  
1.378  
1.357  
1.343  
1.319  
1.293  
1.267  
1.246  
0.893  
0.868  
0.845  
0.824

gsx-4-66

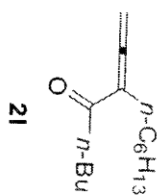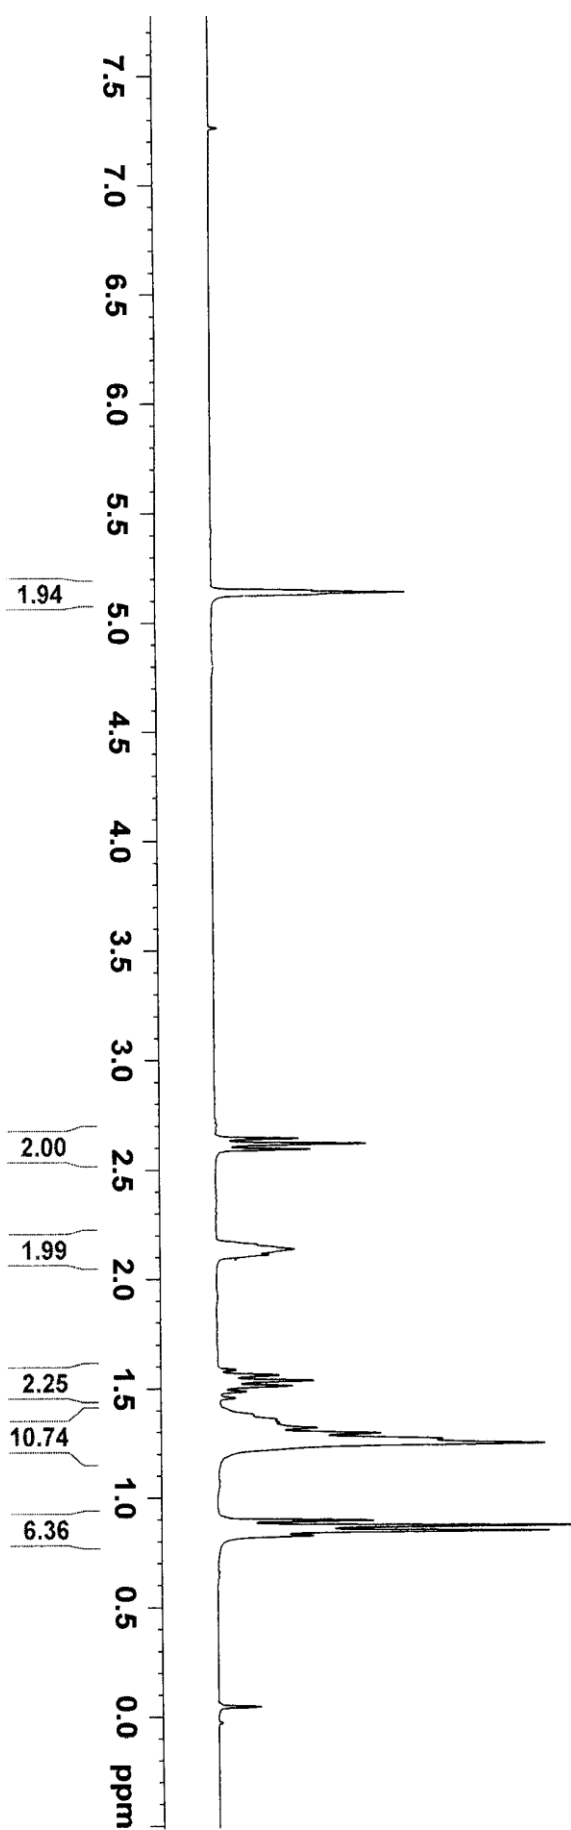



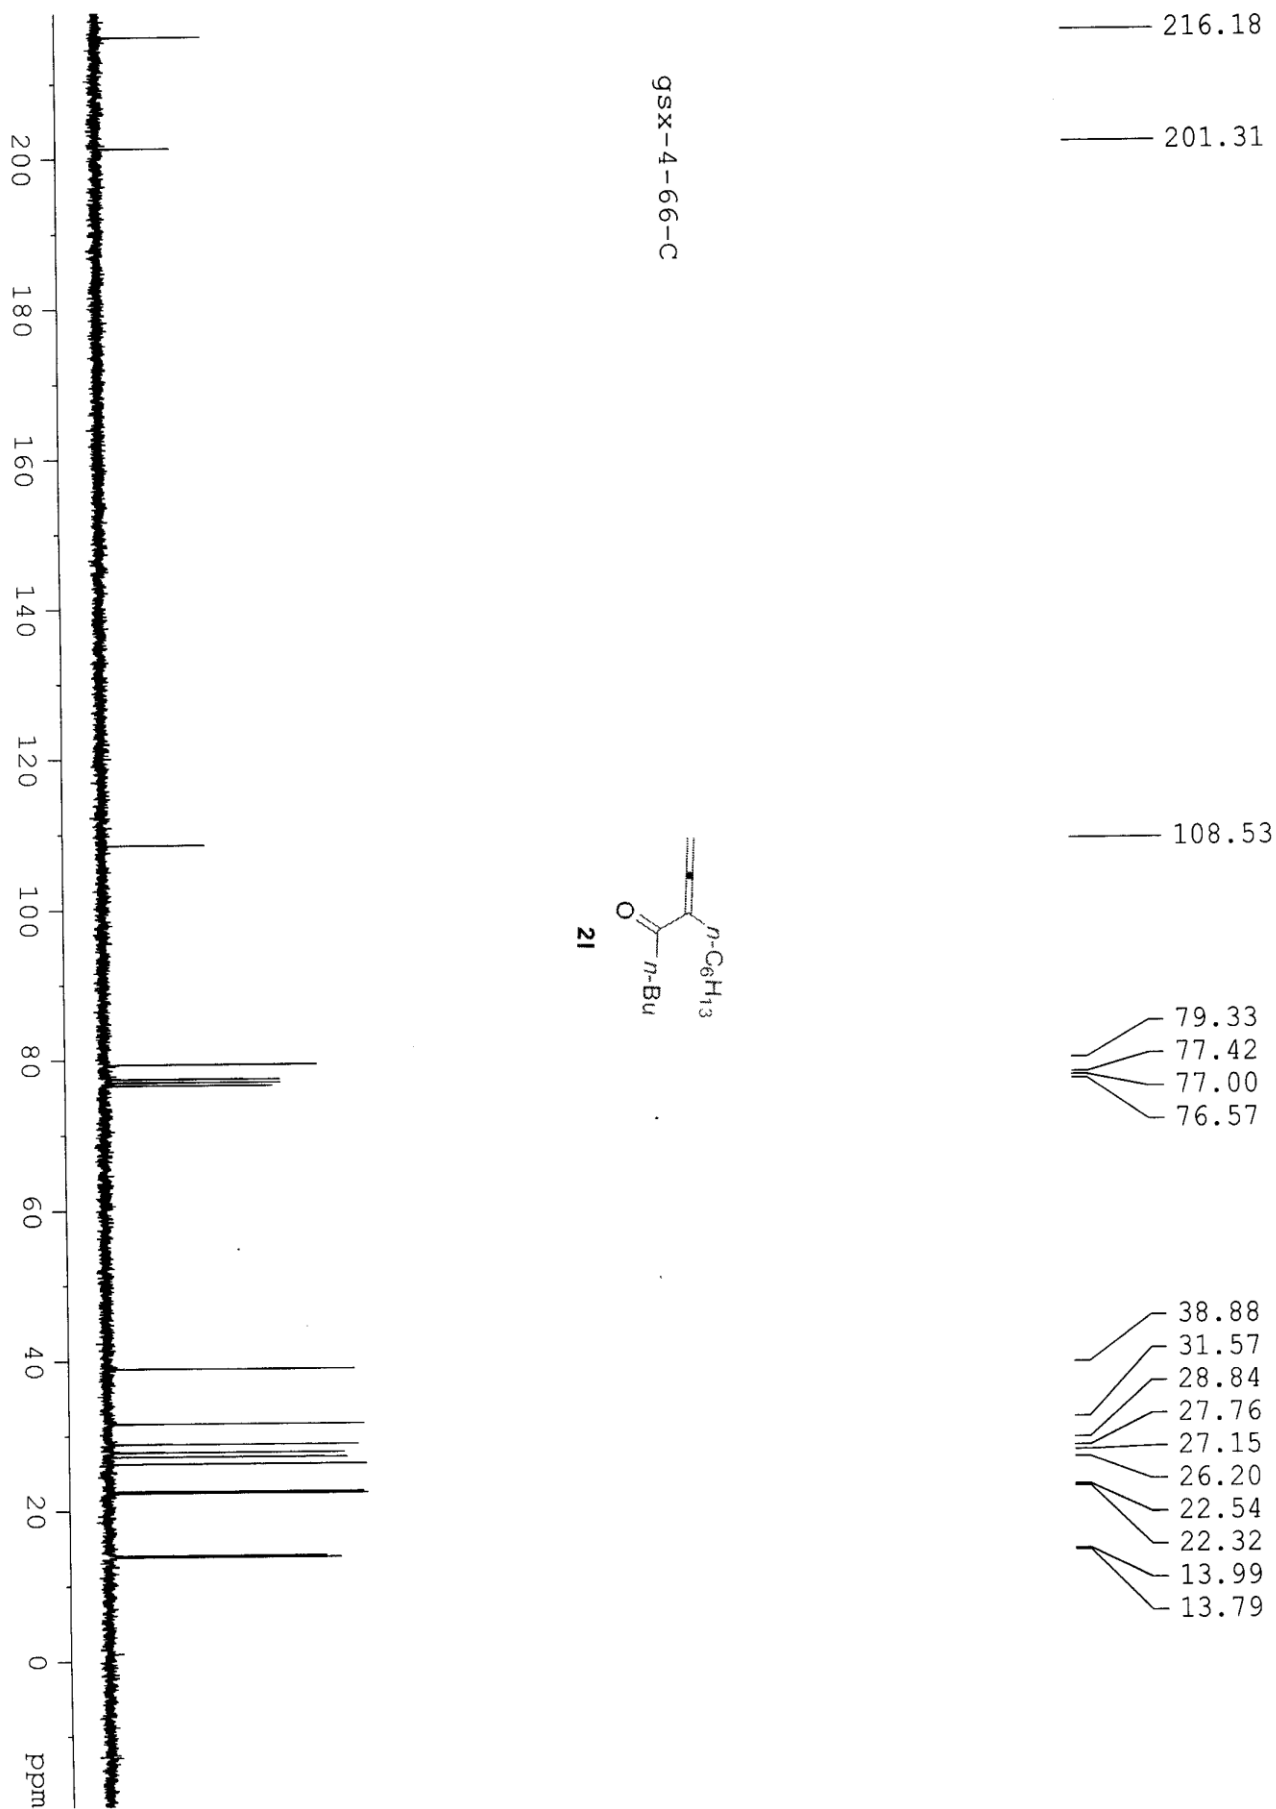

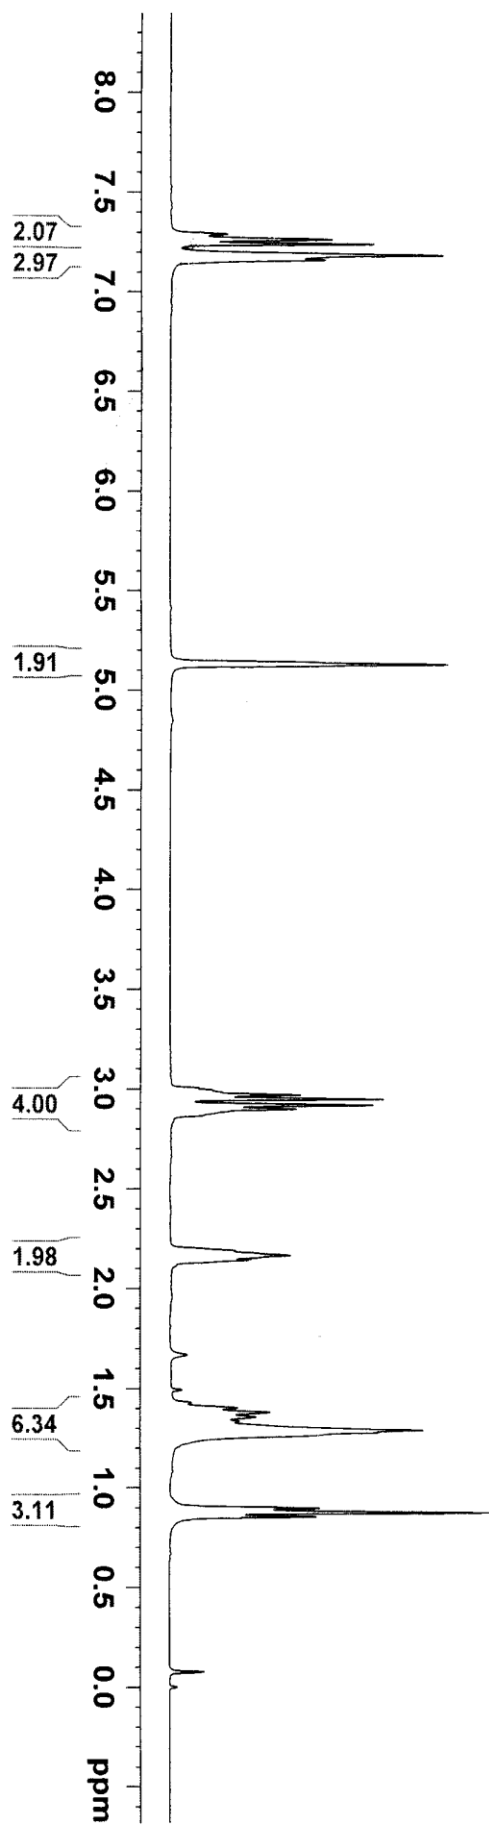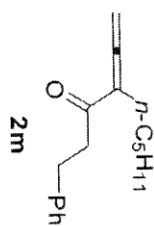

gsx-4-67

7.291  
7.265  
7.242  
7.187  
7.162

5.132

3.003  
2.993  
2.982  
2.970  
2.949  
2.920  
2.899  
2.189  
2.167  
2.142  
1.428  
1.403  
1.380  
1.357  
1.335  
1.291  
1.280  
0.897  
0.877  
0.854

-0.000

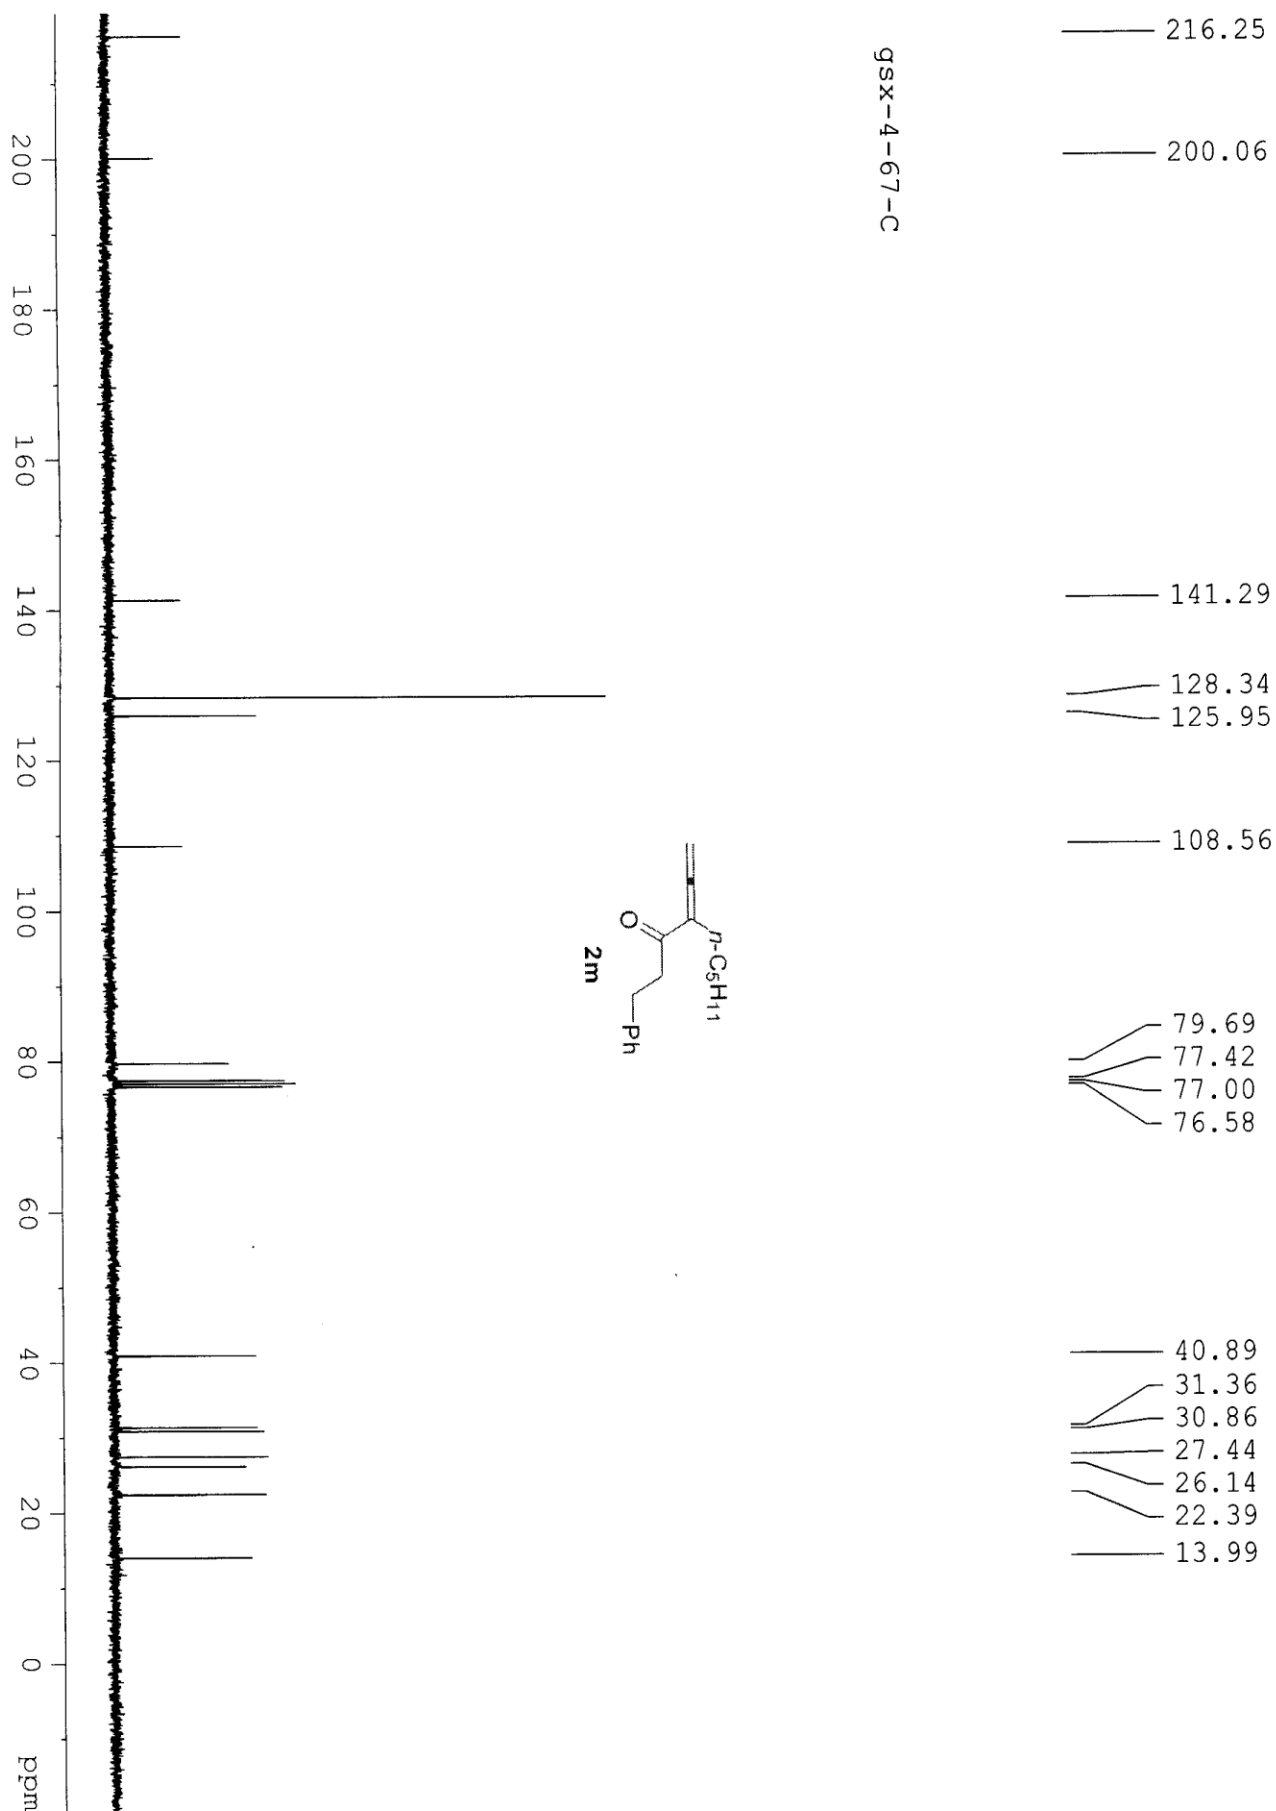

Supplement: Additional file 1 [file 1860-5397-7-51-S1.pdf]
